# Supplementary material
Source: PubMed Central journal article supplement (PMC3931310)
Supplement: NIHMS521235-supplement-01.pdf [file NIHMS521235-supplement-01.pdf]

## SUPPLEMENTAL DATA

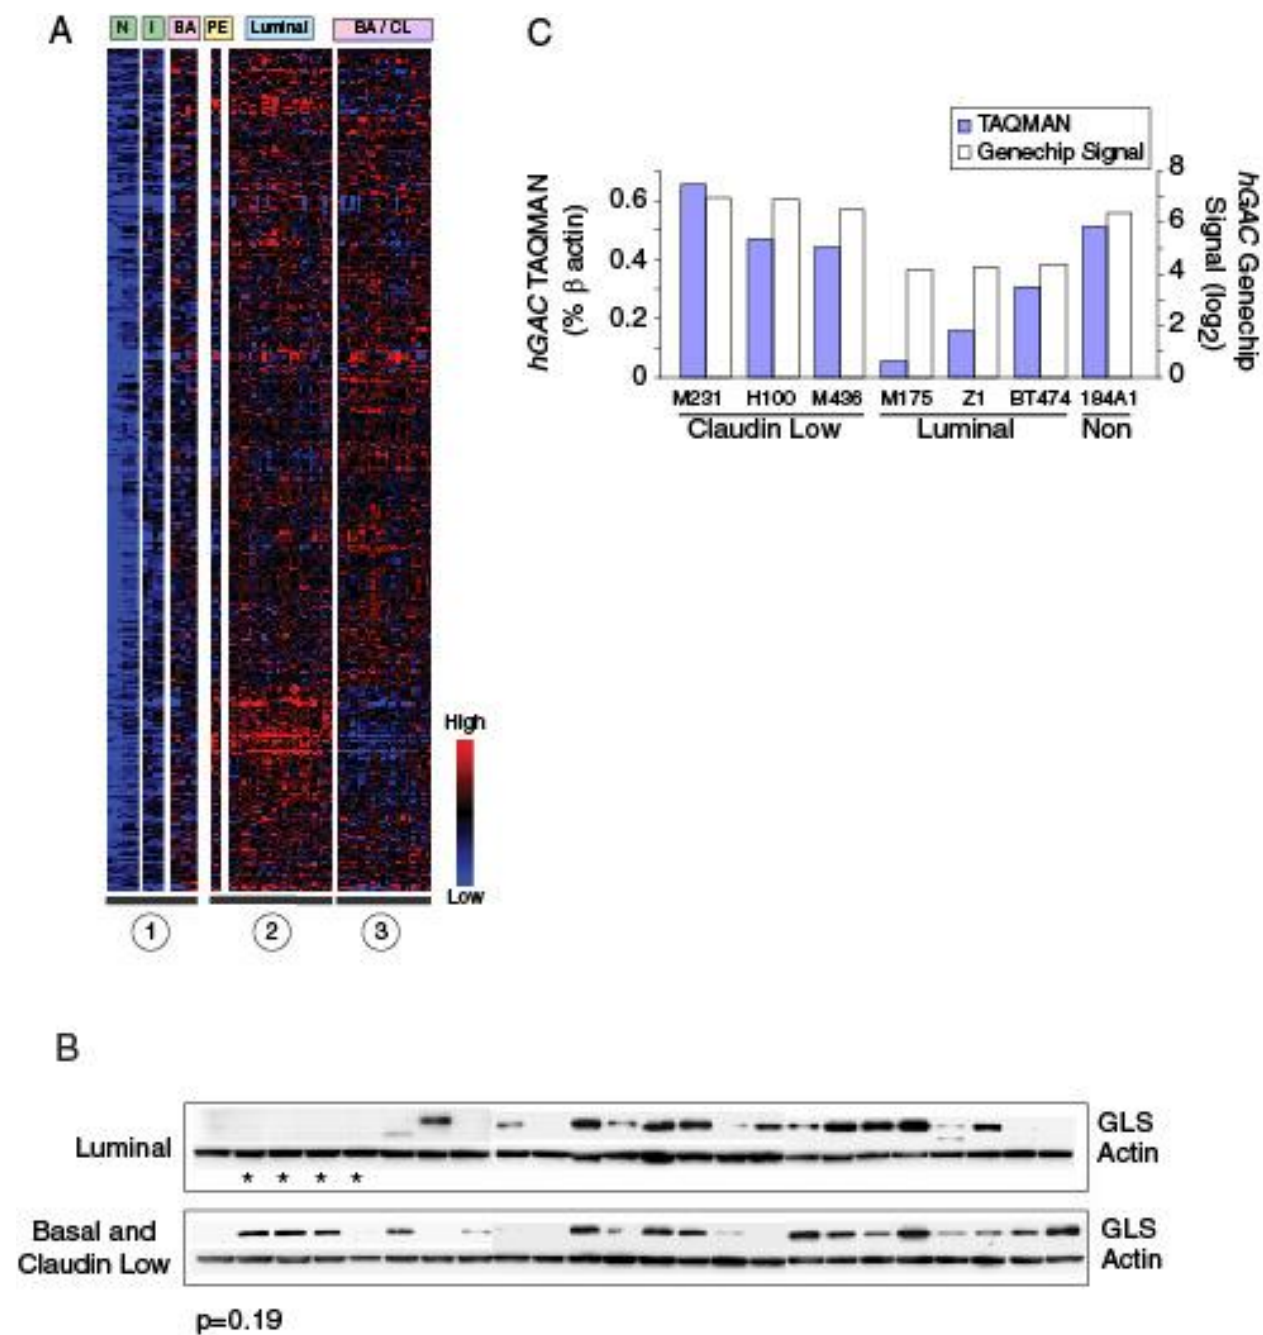

**Figure S1, related to Figure 1. Molecular and Phenotypic Characteristics of Our Breast Cell Line Collection**

Icon codes in figure keys. (A) Cluster and heatmap of metabolic probeset IDs identified in significance analysis comparing normal samples (1) versus Luminal (2) and Basal/Claudin low cell lines (3). Normal samples: N, purified normal CD10<sup>+</sup> and BerEp4<sup>+</sup> breast subsets; I, non-

tumorigenic culture-adapted proliferating breast cell lines derived from human mammary epithelial cells (HMECd). Tumorigenic samples: BA, Basal TNBC lines; PE, uncultured purified tumor samples from patient pleural effusions; Luminal, luminal cell lines; BA/CL, Basal and Claudin low TNBC lines. Black underbars denote major clades formed in cluster analysis. (B) Western blot assessing glutaminase expression levels in tumor-derived cell lines; pairs of sibling cell lines (asterisks) are counted as one independent isolate (AU565 and SKBR3, MCF7 and LY2); Luminal and Basal/Claudin Low cell lines do not differentially express total glutaminase protein,  $p= 0.19$  student's t-test. (C) TAQMAN validation of relative *hGAC* Affymetrix genechip signals for representative cells in our panel.

**Table S1, Related to Figure 1. Tumorigenic Cell Lines Used in This Study<sup>1</sup>**

| <b>Cell Line</b> | <b>Abbreviated Name</b> | <b>Culture Media</b> | <b>Molecular Phenotype</b> | <b>Glutamine Restriction Group</b> |
|------------------|-------------------------|----------------------|----------------------------|------------------------------------|
| BT20             | BT20                    | RPMI / 5% FBS        | Basal                      | C                                  |
| Du4475           | Du4475                  | RPMI / 5% FBS        | Basal                      | X                                  |
| HCC1008          | H1008                   | RPMI / 5% FBS        | Basal                      | X                                  |
| HCC1143          | H1143                   | RPMI / 5% FBS        | Basal                      | X                                  |
| HCC1187          | H1187                   | RPMI / 5% FBS        | Basal                      | X                                  |
| HCC1500          | H1500                   | RPMI / 5% FBS        | Basal                      | C                                  |
| HCC1569          | H1569                   | RPMI / 5% FBS        | Basal                      | B                                  |
| HCC1599          | H1599                   | RPMI / 5% FBS        | Basal                      | X                                  |
| HCC1937          | H1937                   | RPMI / 5% FBS        | Basal                      | X                                  |
| HCC1954          | H1954                   | RPMI / 5% FBS        | Basal                      | A                                  |
| HCC2157          | H2157                   | RPMI / 5% FBS        | Basal                      | X                                  |
| HCC3153          | H3153                   | RPMI / 5% FBS        | Basal                      | A                                  |
| HCC70            | H70                     | RPMI / 5% FBS        | Basal                      | X                                  |
| MDA-MB-468       | M468                    | DMEM / 5% FBS        | Basal                      | X                                  |
| 600MPE           | 600MPE                  | DMEM / 5% FBS        | Luminal                    | X                                  |
| AU565            | AU565                   | DMEM / 5% FBS        | Luminal                    | X                                  |
| BT474            | B474                    | RPMI / 5% FBS        | Luminal                    | X                                  |
| BT483            | B483                    | RPMI / 5% FBS        | Luminal                    | X                                  |
| CAMA-1           | CAMA1                   | DMEM / 5% FBS        | Luminal                    | X                                  |
| HCC1007          | H1007                   | RPMI / 5% FBS        | Luminal                    | X                                  |
| HCC1428          | H1428                   | RPMI / 5% FBS        | Luminal                    | X                                  |
| HCC202           | H202                    | RPMI / 5% FBS        | Luminal                    | X                                  |
| HCC2185          | H2185                   | RPMI / 5% FBS        | Luminal                    | X                                  |
| LY2              | LY2                     | RPMI / 5% FBS        | Luminal                    | A                                  |
| MCF7             | MCF7                    | RPMI / 5% FBS        | Luminal                    | X                                  |
| MCF-10A          | M10A                    | RPMI / 5% FBS        | Basal                      | X                                  |
| MCF12A           | M12A                    | RPMI / 5% FBS        | Basal                      | X                                  |
| MDA-MB-134VI     | M134                    | DMEM / 5% FBS        | Luminal                    | B                                  |
| MDA-MB-175-VII   | M175                    | DMEM / 5% FBS        | Luminal                    | A                                  |
| MDA-MB-361       | M361                    | DMEM / 5% FBS        | Luminal                    | B                                  |
| MDA-MB-415       | M415                    | DMEM / 5% FBS        | Luminal                    | A                                  |
| MDA-MB-453       | M453                    | DMEM / 5% FBS        | Luminal                    | X                                  |
| SKBR3            | SKBR3                   | DMEM / 5% FBS        | Luminal                    | X                                  |
| T47D             | T47D                    | RPMI / 5% FBS        | Luminal                    | X                                  |
| UACC812          | U812                    | DMEM / 5% FBS        | Luminal                    | X                                  |
| ZR-75-1          | Z1                      | RPMI / 5% FBS        | Luminal                    | X                                  |
| ZR-75-30         | Z30                     | RPMI / 5% FBS        | Luminal                    | X                                  |
| ZR-75-B          | ZB                      | RPMI / 5% FBS        | Luminal                    | X                                  |
| BT549            | BT549                   | RPMI / 5% FBS        | Claudin Low                | B                                  |
| HBL100           | H100                    | DMEM / 5% FBS        | Claudin Low                | C                                  |
| HCC38            | H38                     | RPMI / 5% FBS        | Claudin Low                | C                                  |
| HS578t           | Hs578t                  | RPMI / 5% FBS        | Claudin Low                | B                                  |
| MDA-MB-157       | M157                    | DMEM / 5% FBS        | Claudin Low                | B                                  |
| MDA-MB-231       | M231                    | DMEM / 5% FBS        | Claudin Low                | C                                  |
| MDA-MB-435       | M435                    | DMEM / 5% FBS        | Claudin Low                | C                                  |
| MDA-MB-436       | M436                    | DMEM / 5% FBS        | Claudin Low                | C                                  |

<sup>1</sup> Cell line name abbreviations used in this study, the normal culture media for each line, the molecular phenotype, and glutamine restriction group membership; X denotes cell lines with smaller proliferative defects in glutamine-free media than the non-tumorigenic cell lines.

| <b>Significant Class Association</b> | <b>Probeset ID</b> | <b>Gene Symbol</b> | <b>Score</b> |
|--------------------------------------|--------------------|--------------------|--------------|
| Basal CDL                            | 201272_at          | AKR1B1             | 5.98627      |
| Basal CDL                            | 221510_s_at        | GLS                | 5.87002      |
| Basal CDL                            | 202613_at          | CTPS               | 5.75562      |
| Basal CDL                            | 205260_s_at        | ACYP1              | 5.61946      |
| Basal CDL                            | 203909_at          | SLC9A6             | 5.57077      |
| Basal CDL                            | 205996_s_at        | AK2                | 5.44375      |
| Basal CDL                            | 200762_at          | DPYSL2             | 5.26941      |
| Basal CDL                            | 220892_s_at        | PSAT1              | 5.26622      |
| Basal CDL                            | 202026_at          | SDHD               | 5.19516      |
| Basal CDL                            | 205401_at          | AGPS               | 5.15867      |
| Basal CDL                            | 212174_at          | AK2                | 5.11785      |
| Basal CDL                            | 205565_s_at        | FXN                | 5.003        |
| Basal CDL                            | 212604_at          | MRPS31             | 4.92187      |
| Basal CDL                            | 209213_at          | CBR1               | 4.89146      |
| Basal CDL                            | 202589_at          | TYMS               | 4.81951      |
| Basal CDL                            | 201300_s_at        | PRNP               | 4.67459      |
| Basal CDL                            | 219079_at          | NCB5OR             | 4.6724       |
| Basal CDL                            | 217294_s_at        | ENO1               | 4.67206      |
| Basal CDL                            | 211150_s_at        | DLAT               | 4.60905      |
| Basal CDL                            | 219204_s_at        | SRR                | 4.57848      |
| Basal CDL                            | 219698_s_at        | METTL4             | 4.52715      |
| Basal CDL                            | 218558_s_at        | MRPL39             | 4.49672      |
| Basal CDL                            | 215535_s_at        | AGPAT1             | 4.49345      |
| Basal CDL                            | 215707_s_at        | PRNP               | 4.39831      |
| Basal CDL                            | 201012_at          | ANXA1              | 4.37549      |
| Basal CDL                            | 203340_s_at        | SLC25A12           | 4.34122      |
| Basal CDL                            | 221020_s_at        | MFTC               | 4.33304      |
| Basal CDL                            | 205379_at          | CBR3               | 4.33221      |
| Basal CDL                            | 201968_s_at        | PGM1               | 4.30168      |
| Basal CDL                            | 200978_at          | MDH1               | 4.25182      |
| Basal CDL                            | 221437_s_at        | MRPS15             | 4.19826      |
| Basal CDL                            | 201634_s_at        | CYB5-M             | 4.11264      |
| Basal CDL                            | 213133_s_at        | GCSH               | 4.10644      |
| Basal CDL                            | 202502_at          | ACADM              | 4.09831      |
| Basal CDL                            | 219220_x_at        | MRPS22             | 4.0809       |
| Basal CDL                            | 208746_x_at        | ATP5L              | 4.03913      |
| Basal CDL                            | 218982_s_at        | MRPS17             | 3.98973      |
| Basal CDL                            | 202345_s_at        | FABP5              | 3.97897      |
| Basal CDL                            | 214431_at          | GMPS               | 3.96944      |
| Basal CDL                            | 212568_s_at        | DLAT               | 3.95771      |
| Basal CDL                            | 216705_s_at        | ADA                | 3.95428      |
| Basal CDL                            | 200818_at          | ATP5O              | 3.94961      |
| ...                                  | ...                | ...                | ...          |

<sup>2</sup> Scores for metabolism-associated transcripts positively associated with the sample classes indicated in column 1, for each of three significance analyses. Analyses were: 1. Purified normal samples plus non-tumorigenic, culture adapted cells (N/I) versus carcinoma derived cell lines and uncultured pleural effusions (CDL/PE); 2. Basal carcinomas versus all other samples (Basal CDL); 3. Luminal carcinomas versus all other samples (Luminal CDL). See EXCEL file 'Timmerman Table S2 for full list.



| Gene Set ID | Total samp no. | Association tested                                                                                                                   | <i>p</i> -values <i>hGAC</i> 221510_s_at           | <i>p</i> -values <i>GLS</i> 203157_s_at | <i>p</i> -values <i>GLS</i> 203158_s_at | <i>p</i> -values <i>GLS</i> 203159_at | <i>p</i> -values <i>GLS</i> 211414_at |
|-------------|----------------|--------------------------------------------------------------------------------------------------------------------------------------|----------------------------------------------------|-----------------------------------------|-----------------------------------------|---------------------------------------|---------------------------------------|
| GSE1561     | 49             | - Apocrine/luminal (32) vs. basal (16)<br>- ER status (22 ER-; 27 ER+)                                                               | 3.3e-9 (basal)<br>0.001 (ER-)                      | 0.514 (basal)<br>0.442 (ER-)            | 0.011 (basal)<br>0.015 (ER-)            | 0.655 (basal)<br>0.964 (ER-)          | 0.016 (basal)<br>0.011 (ER-)          |
| GSE2034     | 286            | - ER status (77 ER-; 209 ER+)                                                                                                        | 4.2e-11 (ER-)                                      | 0.060 (ER-)                             | 3.4e-8 (ER-)                            | 0.002 (ER-)                           | 0.170 (ER-)                           |
| GSE20271    | 177            | - ER status (78 ER-; 98 ER+)                                                                                                         | 1.7e-4 (ER-)                                       | 4.4e-5 (ER-)                            | 1.6e-4 (ER-)                            | 0.031 (ER-)                           | 4.6e-4 (ER-)                          |
| GSE23988    | 61             | - ER status (29 ER-; 32 ER+)                                                                                                         | 2.4e-7 (ER-)                                       | 0.089 (ER-)                             | 0.010 (ER-)                             | 0.278 (ER-)                           | 0.364 (ER-)                           |
| GSE4922     | 289            | - ER status (34 ER-; 211 ER+)                                                                                                        | 5.3e-10 (ER-)                                      | 0.969 (ER-)                             | 0.026 (ER-)                             | 0.527 (ER-)                           | 0.087 (ER-)                           |
| GSE1456     | 159            | - Luminal A/B (62) vs basal (25)                                                                                                     | 1.2e-8 (basal)                                     | 0.173 (basal)                           | 0.002 (basal)                           | 0.003 (basal)                         | 0.080 (basal)                         |
| GSE7390     | 198            | - ER status (64 ER-; 134 ER+)                                                                                                        | 1.2e-7 (ER-)                                       | 0.060 (ER-)                             | 1.4e-6 (ER-)                            | 0.041 (ER-)                           | 0.003 (ER-)                           |
| Chin 2006   | 118            | - ER status (43 ER-; 75 ER+)<br>- Subtype Euclidean-based (66 lumA/B; 28 basal)<br>- Subtype correlation-based (61 lumA/B; 30 basal) | 4.5e-8 (ER-)<br>2.2e-13 (basal)<br>4.7e-13 (basal) | ND                                      | ND                                      | ND                                    | ND                                    |

<sup>3</sup> Datasets were downloaded from NCBI GEO or obtained from Chin et al. (Chin, et al. 2006) and analyzed for gene expression differences between classes based on ER status and molecular subtype (Student's t-test)

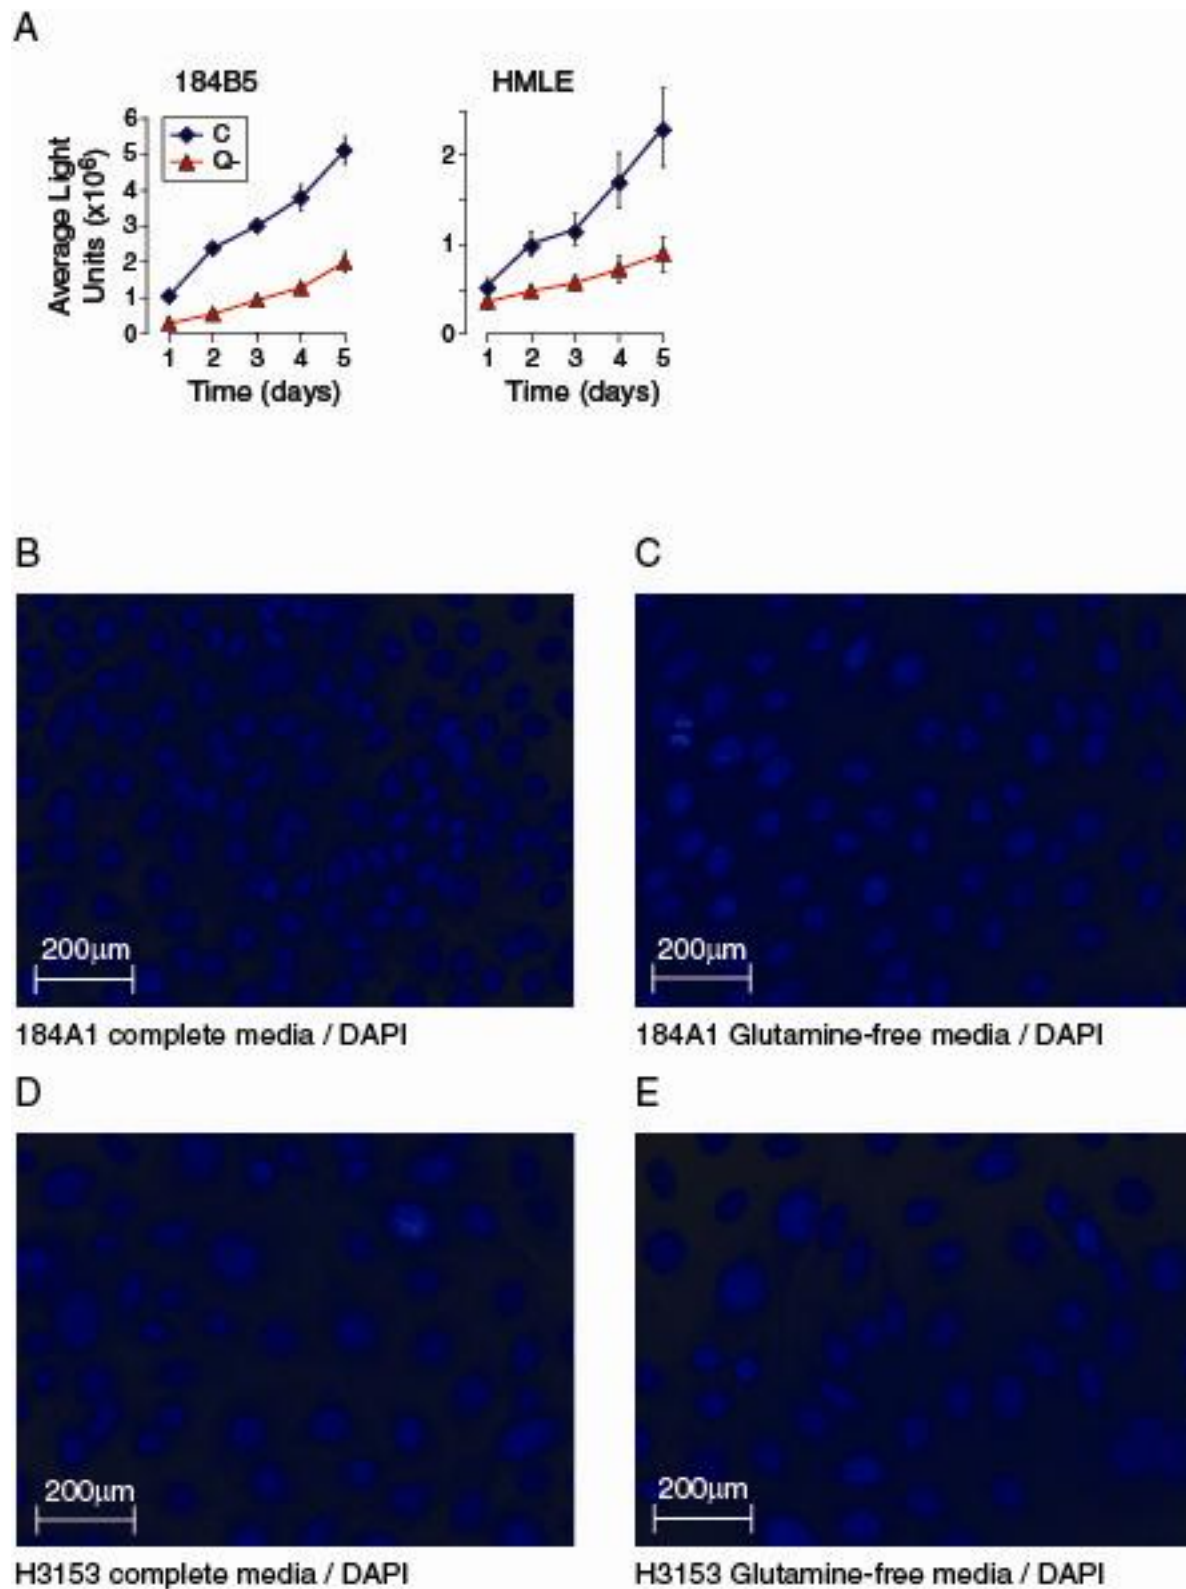

**Figure S2, related to Figure 2. Non-Tumorigenic Cells Adapt to Glutamine Restriction by Slowing Culture Expansion**

(A) Growth curves of two additional non-tumorigenic cell lines (184B5, HMLE); C, complete media; Q-, glutamine-free media. Icons represent mean values; error bars, standard deviations.

(B-E) Regular nuclear morphology of glutamine free and complete media cultures (DAPI stain).

(B and C) 184A1 non-tumorigenic cells; (D and E) H3153, a similarly-sensitive TNBC line.

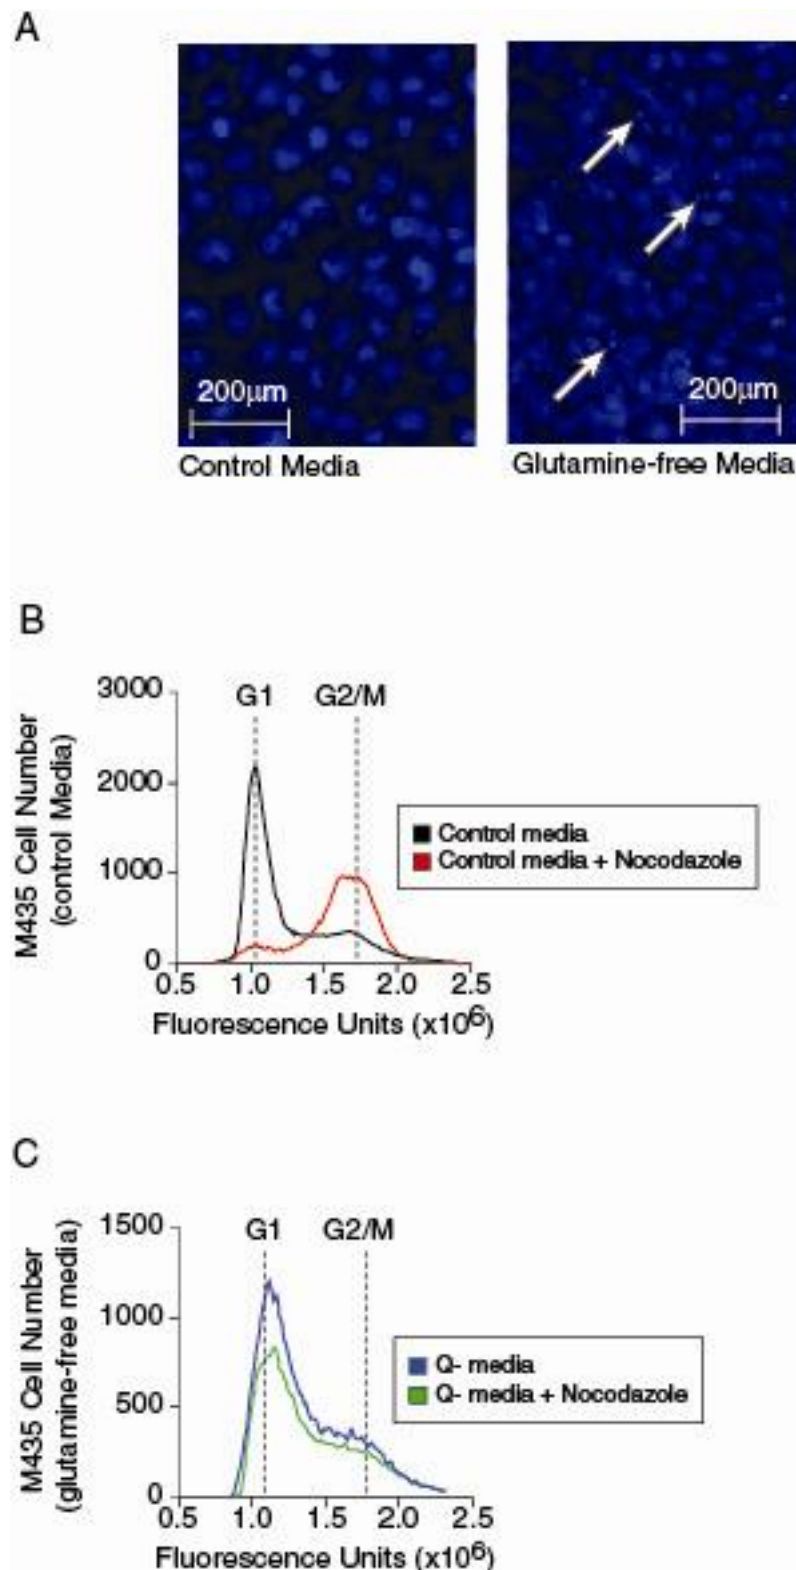

**Figure S3, related to Figure 3. Glutamine Restriction Induces S-Phase Stalling and Apoptosis in Group C Carcinomas**

Icon codes in figure keys. (A) Nuclear morphology (DAPI stain) of a representative group C TNBC line grown in (left) control media vs. (right) glutamine free media, arrows at apoptotic figures. (B) Example cell cycle profiles of a Group C TNBC line cultured 5 days in complete media with and without 18 hours nocodazole treatment (red vs. black curves); (C) Example cell cycle profiles of a Group C TNBC line cultured 5 days in glutamine-free media without and with 18 hours nocodazole treatment (blue vs green curves)

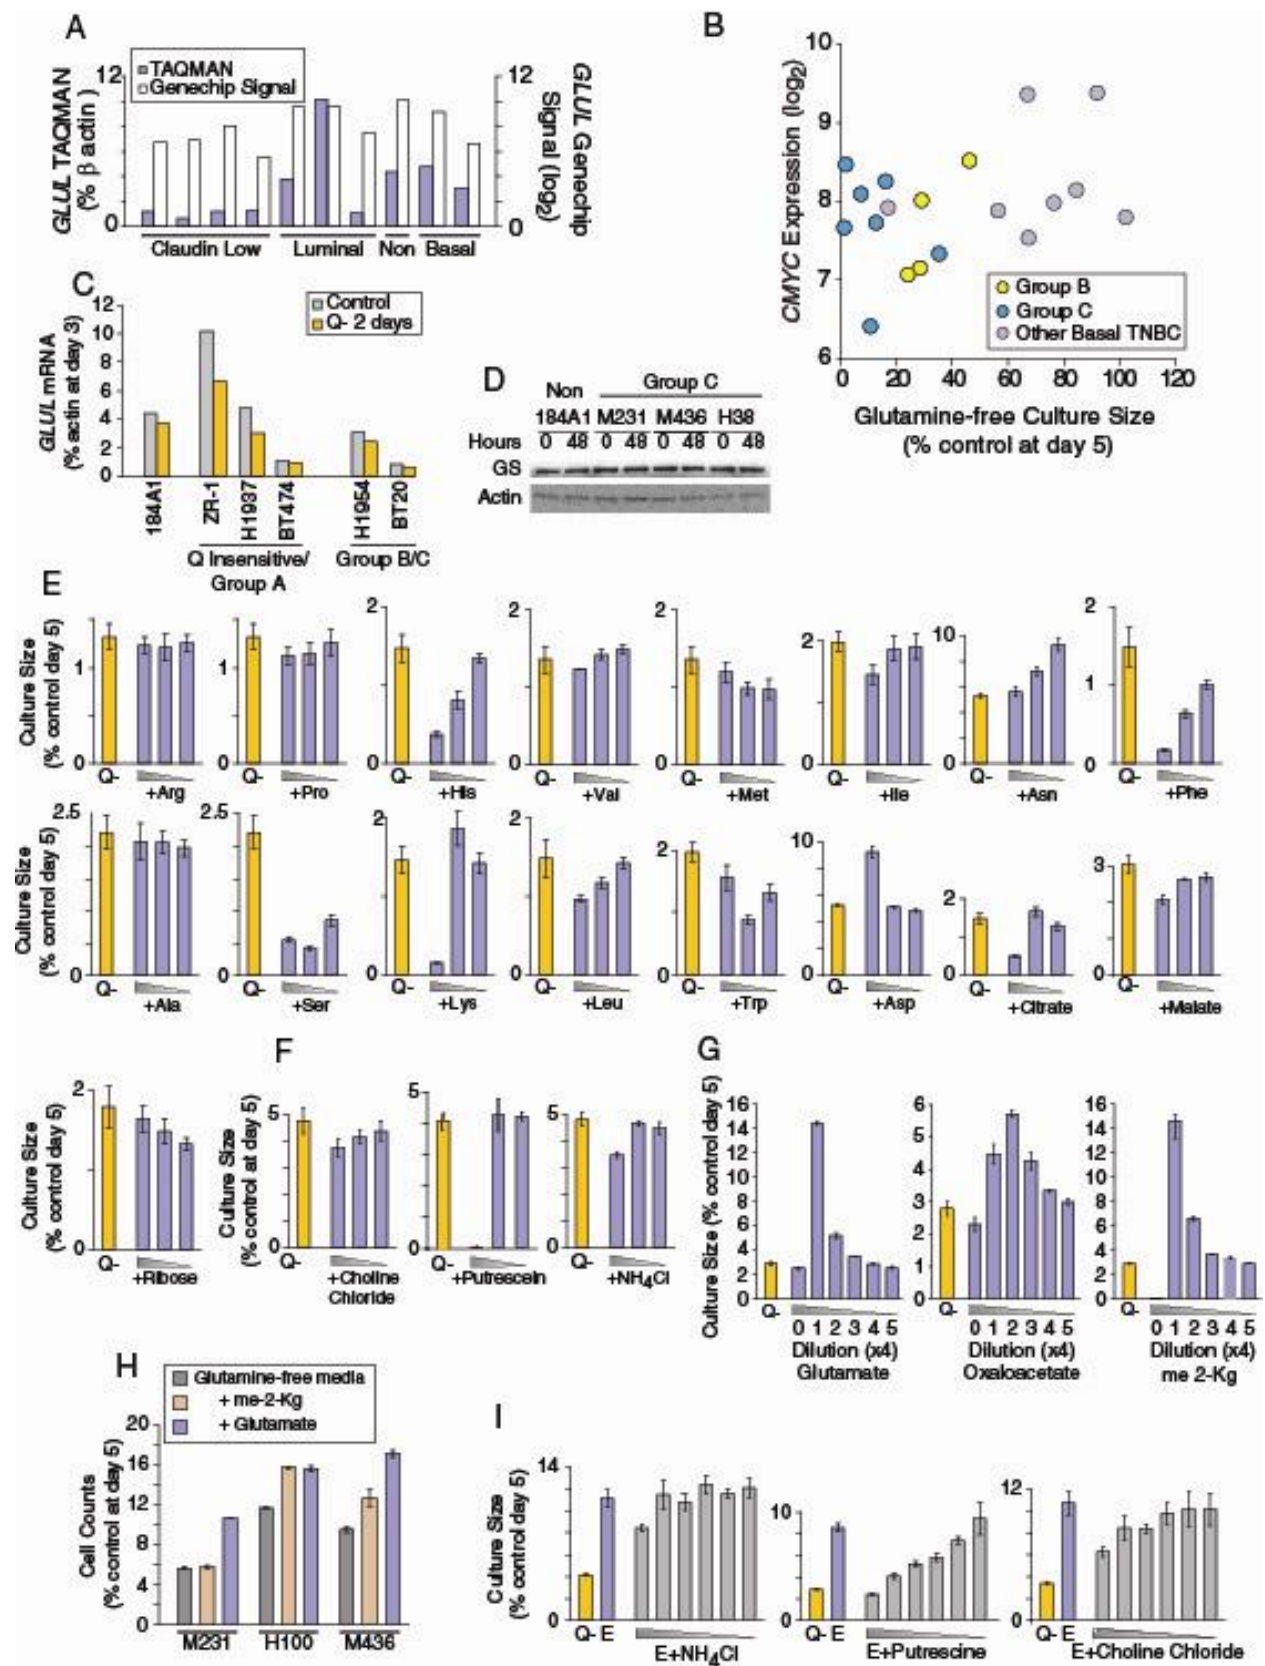

Figure S4, related to Figure 4. Glutamine is an irreplaceable nutrient for some TNBC

Icon codes in figure keys. Icons represent mean values  $\pm$ SD. (A) TAQMAN validation of relative *GLUL* Genechip signals for representative cells in our panel. (B) *cMYC* genechip hybridization signal (y-axis) versus glutamine-free culture sizes, derived from Figure 2A. (C) *GLUL* mRNA is not induced upon glutamine restriction; Q insensitive, basal TNBC with smaller glutamine-restricted proliferative defects than the non-tumorigenic cell lines; paired bars represent mRNA measurements (TAQMAN) in individual cell lines; Control, control media; Q-, glutamine-free media (see also Figure 4E). (D) Glutamine synthetase protein levels are not substantially altered in response to 48 hours of glutamine restriction; non, non tumorigenic exemplar 184A1. (E-H) Proliferative analysis of alternate nutrient additions; values normalized to control media population sizes; Icons represent mean values; error bars, standard deviations. (E) Yellow bar, Q-, glutamine free media alone; blue bars, glutamine free media plus 20mM alternate nutrient and 2 serial 4X dilutions shown; standard three letter abbreviations used for amino acids. (F) Titrations of amino group sources does not restore culture expansion, icon codes and conditions per part E. (G, H) Nutrients that marginally increase glutamine-free culture sizes; me 2-KG, dimethyl 2-ketoglutarate. (G) ATP-based cell titer assay using M436; icon codes and conditions per part E. (H) Direct cell counts (Accuri) in 3 Group C cell lines. (I) Glutamate plus titrations of amino group sources do not improve culture expansion over glutamate alone in glutamine-free media; yellow bar, Q-, glutamine free media alone; E, glutamate in glutamine-free media; gray bars, various amino group sources with glutamate in glutamine-free media; dilutions are 4X from 20mM.

| <b>Table S4, related to Figure 4. Class Associations of <i>GLUL</i> in Expression Datasets Derived from Primary Clinical Tumor Samples<sup>4</sup></b> |                           |                                    |                                    |                                    |
|--------------------------------------------------------------------------------------------------------------------------------------------------------|---------------------------|------------------------------------|------------------------------------|------------------------------------|
| <b>Gene Set ID</b>                                                                                                                                     | <b>Association tested</b> | <b><i>GLUL</i><br/>200648 s_at</b> | <b><i>GLUL</i><br/>217202 s_at</b> | <b><i>GLUL</i><br/>215001 s_at</b> |
| GSE<br>1561                                                                                                                                            | ER (ER+)                  | 0.171 / -1.36                      | 0.149 / -1.30                      | 0.741 / 1.04                       |
|                                                                                                                                                        | Subtype (Luminal)         | 0.828 / -1.10                      | 0.830 / -1.09                      | 0.196 / 1.15                       |
| GSE<br>2034                                                                                                                                            | ER (ER+)                  | 0.024 / 1.30                       | 0.024 / 1.16                       | 1.3e-15 / 1.81                     |
| GSE<br>20271                                                                                                                                           | ER (ER+)                  | 2.3e-6 / 2.13                      | 9.4e-5 / 1.65                      | 4.0e-8 / 1.93                      |
| GSE<br>23988                                                                                                                                           | ER (ER+)                  | 2.1e-4 / 2.66                      | 0.004 / 1.92                       | 4.7e-6 / 2.20                      |
| GSE<br>4922                                                                                                                                            | ER (ER+)                  | 9.2e-4 / 1.87                      | 5.7e-4 / 1.92                      | 1.0e-6 / 1.61                      |
| GSE<br>1456                                                                                                                                            | Subtype<br>(Luminal)      | 1.0e-8 / 4.52                      | 3.9e-7 / 3.64                      | 4.9e-10 / 2.63                     |
| GSE<br>7390                                                                                                                                            | ER (ER+)                  | 5.4e-6 / 1.95                      | 1.8e-6 / 1.99                      | 1.7e-9 / 1.75                      |
| Chin<br>2006                                                                                                                                           | ER (ER+)                  | 0.005 / 2.09                       | 0.004 / 2.44                       | 8.6e-7 / 1.73                      |
| Chin<br>2006                                                                                                                                           | Subtype (eucl) (Luminal)  | 2.1e-4 / 2.82                      | 8.3e-5 / 3.49                      | 2.7e-10 / 2.36                     |
| Chin<br>2006                                                                                                                                           | Subtype (corr) (Luminal)  | 2.7e-4 / 2.79                      | 1.3e-4 / 3.47                      | 5.6e-10 / 2.31                     |

<sup>4</sup> Datasets were downloaded from NCBI GEO or obtained from Chin et al. (Chin, et al. 2006) and analyzed for gene expression differences between classes based on ER status or molecular subtype: p value (t-test) / fold change, where ratio of average marker expression in ER+/luminal vs. ER-/basal samples in raw expression data (>1 means up-regulation in ER+/luminal, and <-1 means up-regulation in ER-/basal).



| <b>Table S5, related to Figure 4. Myc Association Statistics</b> |                                                                                      |                                                               |                                                                 |
|------------------------------------------------------------------|--------------------------------------------------------------------------------------|---------------------------------------------------------------|-----------------------------------------------------------------|
| <b>Probeset ID</b>                                               | <b>Myc Family Member /<br/>Transcriptional Target<br/>Gene</b>                       | <b>t-test Group C vs<br/>all Basal +<br/>Claudin low, p =</b> | <b>t-test Group B+C<br/>vs all Basal +<br/>Claudin Low, p =</b> |
| 202922_at                                                        | GCLC, glutamate-cysteine<br>ligase, catalytic subunit                                | 0.680732996                                                   | 0.285144004                                                     |
| 202923_s_at                                                      | GCLC, glutamate-cysteine<br>ligase, catalytic subunit                                | 0.930452219                                                   | 0.232623985                                                     |
| 203925_at                                                        | GCLM, glutamate-cysteine<br>ligase, modifier subunit                                 | 0.744924053                                                   | 0.992793651                                                     |
| 221510_s_at                                                      | GLS, glutaminase                                                                     | 0.07184016                                                    | 0.30721294                                                      |
| 203157_s_at                                                      | GLS, glutaminase                                                                     | 0.038305794                                                   | 0.066323391                                                     |
| 203158_s_at                                                      | GLS, glutaminase                                                                     | 0.158391485                                                   | 0.482694785                                                     |
| 203159_at                                                        | GLS, glutaminase                                                                     | 0.114072714                                                   | 0.225283679                                                     |
| 205531_s_at                                                      | GLS2, glutaminase 2 (liver,<br>mitochondrial)                                        | 0.074431839                                                   | 0.088951816                                                     |
| 200648_s_at                                                      | GLUL, glutamate-ammonia<br>ligase (glutamine synthase)                               | 0.259776929                                                   | 0.026125116                                                     |
| 215001_s_at                                                      | GLUL, glutamate-ammonia<br>ligase (glutamine synthase)                               | 0.792003217                                                   | 0.17200119                                                      |
| 217202_s_at                                                      | GLUL, glutamate-ammonia<br>ligase (glutamine synthase)                               | 0.245547385                                                   | 0.053102733                                                     |
| 200650_s_at                                                      | LDHA, lactate<br>dehydrogenase A                                                     | 0.266049864                                                   | 0.082323534                                                     |
| 208403_x_at                                                      | MAX, MYC associated<br>factor X                                                      | 0.981466482                                                   | 0.951836406                                                     |
| 209331_s_at                                                      | MAX, MYC associated<br>factor X                                                      | 0.249051824                                                   | 0.604375051                                                     |
| 209332_s_at                                                      | MAX, MYC associated<br>factor X                                                      | 0.116828225                                                   | 0.070735325                                                     |
| 210734_x_at                                                      | MAX, MYC associated<br>factor X                                                      | 0.762960743                                                   | 0.835511118                                                     |
| 203159_at                                                        | GLS, glutaminase                                                                     | 0.114072714                                                   | 0.225283679                                                     |
| 214108_at                                                        | MAX, MYC associated<br>factor X                                                      | 0.749550292                                                   | 0.414116063                                                     |
| 207824_s_at                                                      | MAZ, MYC-associated zinc<br>finger protein (purine-<br>binding transcription factor) | 0.003248803                                                   | 0.000688372                                                     |
| 212064_x_at                                                      | MAZ, MYC-associated zinc<br>finger protein (purine-<br>binding transcription factor) | 0.006013447                                                   | 0.036746352                                                     |
| 213188_s_at                                                      | MINA, MYC induced<br>nuclear antigen                                                 | 0.422365219                                                   | 0.389165846                                                     |
| 213189_at                                                        | MINA, MYC induced<br>nuclear antigen                                                 | 0.272299316                                                   | 0.347385343                                                     |
| 202431_s_at                                                      | MYC, v-myc<br>myelocytomatosis viral<br>oncogene homolog (avian)                     | 0.15501392                                                    | 0.068167919                                                     |

| <b>Table S5 (cont'd). Myc Association Statistics<sup>5</sup></b> |                                                                                          |                                                       |                                                         |
|------------------------------------------------------------------|------------------------------------------------------------------------------------------|-------------------------------------------------------|---------------------------------------------------------|
| <b>Probeset ID</b>                                               | <b>Myc Family Member / Transcriptional Target Gene</b>                                   | <b>t-test Group C vs all Basal + Claudin low, p =</b> | <b>t-test Group B+C vs all Basal + Claudin Low, p =</b> |
| 203359_s_at                                                      | MYCBP, c-myc binding protein                                                             | 0.747532179                                           | 0.141452857                                             |
| 203360_s_at                                                      | MYCBP, c-myc binding protein                                                             | 0.459129501                                           | 0.181826356                                             |
| 203361_s_at                                                      | MYCBP, c-myc binding protein                                                             | 0.673391404                                           | 0.456707435                                             |
| 201959_s_at                                                      | MYCBP2, MYC binding protein 2                                                            | 0.56877653                                            | 0.116142118                                             |
| 201960_s_at                                                      | MYCBP2, MYC binding protein 2                                                            | 0.843906145                                           | 0.156008882                                             |
| 209757_s_at                                                      | MYCN, v-myc myelocytomatosis viral related oncogene, neuroblastoma derived (avian)       | 0.318485559                                           | 0.234655027                                             |
| 214787_at                                                        | MYCPBP, c-myc promoter binding protein                                                   | 0.600841503                                           | 0.039313472                                             |
| 203964_at                                                        | NMI, N-myc (and STAT) interactor                                                         | 0.586342711                                           | 0.199606276                                             |
| 201599_at                                                        | OAT, ornithine aminotransferase (gyrate atrophy)                                         | 0.324024156                                           | 0.233368527                                             |
| 204243_at                                                        | RLF, rearranged L-myc fusion sequence                                                    | 0.673422221                                           | 0.199249805                                             |
| 208916_at                                                        | SLC1A5, solute carrier family 1 (neutral amino acid transporter), member 5               | 0.632444253                                           | 0.968534998                                             |
| 218237_s_at                                                      | SLC38A1, solute carrier family 38, member 1                                              | 0.2669149                                             | 0.02960135                                              |
| 218041_x_at                                                      | SLC38A2, solute carrier family 38, member 2                                              | 0.635279484                                           | 0.554865205                                             |
| 220924_s_at                                                      | SLC38A2, solute carrier family 38, member 2                                              | 0.671218493                                           | 0.525109732                                             |
| 207528_s_at                                                      | SLC7A11, solute carrier family 7, (cationic amino acid transporter, y+ system) member 11 | 0.072142142                                           | 0.016771364                                             |
| 201195_s_at                                                      | SLC7A5, solute carrier family 7 (cationic amino acid transporter, y+ system), member 5   | 0.91245638                                            | 0.347283019                                             |

<sup>5</sup>A summary of statistical analyses (t-tests) comparing expression levels of MYC, MYC family members, and various Myc transcriptional targets in the auxotrophic samples (Groups B and C) versus other basal and claudin low samples. Expression values from Affymetrix U133A genechip hybridization signals

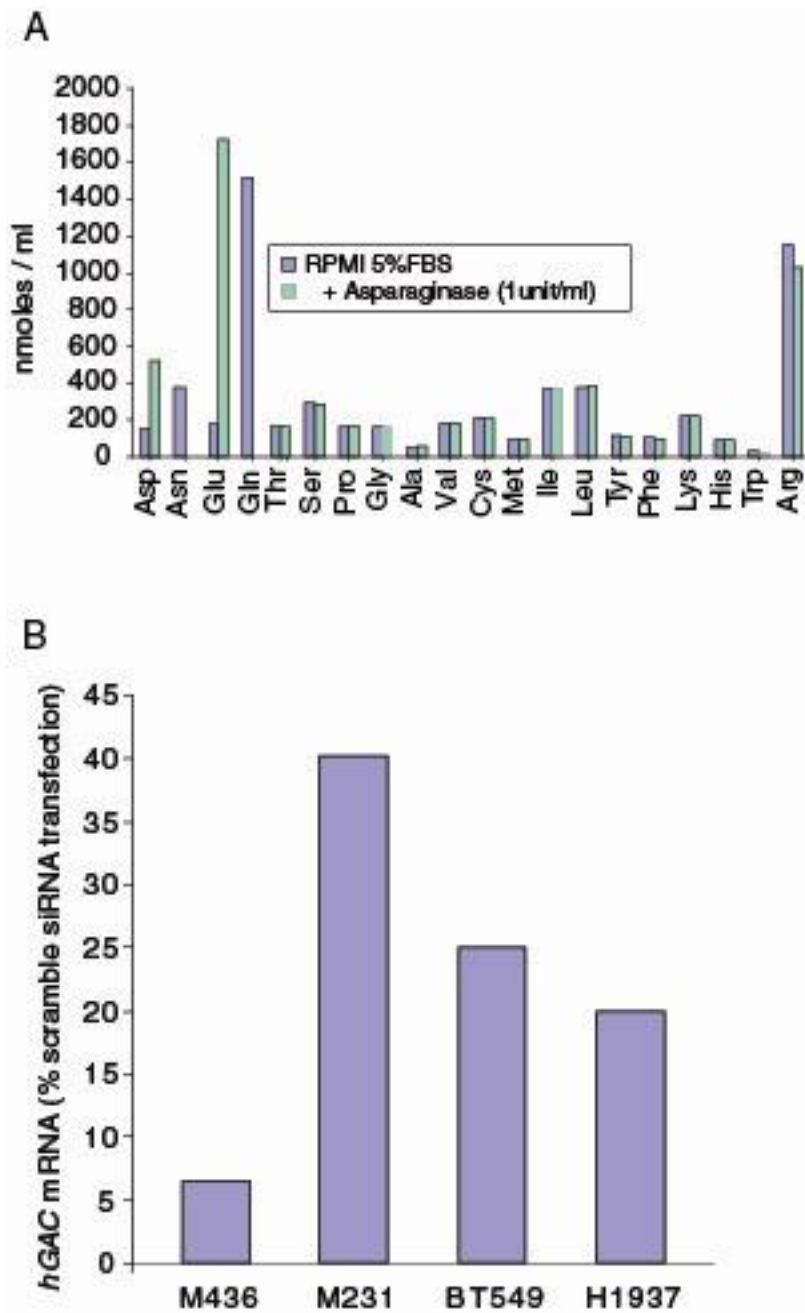

**Figure S5, related to Figure 5. Glutamine Auxotrophy Presents Therapeutic Opportunity**

(A) Amino acid analysis of RPMI culture media treated with and with out Asparaginase (1u/ml); standard 3-letter amino acid abbreviations used, analysis by HPLC. (B) Efficiency of *hGAC* siRNA-mediated mRNA knockdown in 4 exemplar cell lines, values normalized to *hGAC* message levels in each cell line transfected with a negative control siRNA. Corresponding proliferative defects illustrated in Figure 5H.

**Table S6, related to Figure 5.** Class Associations of Glutamine Transporter Probeset IDs in Expression Datasets Derived from Primary Clinical Tumor Samples<sup>6</sup>

| Gene Set ID | Association tested       | ASCT2 208916_at | SLC38A1 218237_s_at | SLC38A2 220924_s_at | SLC38A2 218041_x_at | SLC7A5 201195_s_at | SLC3A2 200924_s_at |
|-------------|--------------------------|-----------------|---------------------|---------------------|---------------------|--------------------|--------------------|
| GSE 1561    | ER (ER+)                 | 0.339 / -1.07   | 0.318 / 1.19        | 0.051 / 1.27        | 0.038 / 1.29        | 4.5e-6 / -2.64     | 0.765 / -1.00      |
|             | Subtype (Luminal)        | 0.286 / 1.09    | 0.003 / 2.35        | 0.014 / 1.37        | 0.015 / 1.37        | 3.6e-5 / -2.12     | 0.407 / 1.18       |
| GSE 2034    | ER (ER+)                 | 0.016 / -1.16   | 0.018 / 1.24        | 0.519 / 1.06        | 0.551 / 1.06        | 1.1e-15 / -2.52    | 0.019 / -1.14      |
| GSE 20271   | ER (ER+)                 | 0.337 / -1.02   | 0.006 / 1.56        | 0.008 / 1.32        | 0.003 / 1.35        | 1.6e-4 / -1.64     | 0.539 / -1.02      |
| GSE 23988   | ER (ER+)                 | 0.248 / 1.11    | 2.3e-5 / 2.91       | 9.6e-6 / 2.05       | 7.4e-6 / 2.18       | 0.054 / -1.18      | 0.480 / 1.12       |
| GSE 4922    | ER (ER+)                 | 0.267 / -1.05   | 0.042 / 1.41        | 0.902 / 1.07        | 0.937 / 1.05        | 1.91e-12 / -3.24   | 0.699 / 1.06       |
| GSE 1456    | Subtype (Luminal)        | 0.145 / 1.15    | 0.013 / 1.91        | 0.295 / -1.14       | 0.411 / -1.12       | 1.7e-5 / -2.84     | 0.868 / -1.00      |
| GSE 7390    | ER (ER+)                 | 3.4e-5 / -1.31  | 0.021 / 1.03        | 0.695 / -1.02       | 0.519 / -1.05       | 1.1e-15 / -3.08    | 0.005 / -1.15      |
| Chin 2006   | ER (ER+)                 | 0.192 / -1.03   | 0.132 / 1.43        | 0.180 / 1.21        | 0.335 / 1.19        | 1.1e-6 / -2.30     | 0.175 / 1.12       |
| Chin 2006   | Subtype (eucl) (Luminal) | 0.556 / 1.05    | 0.008 / 2.23        | 0.023 / 1.36        | 0.036 / 1.34        | 1.1e-7 / -2.57     | 0.878 / 1.29       |
| Chin 2006   | Subtype (corr) (Luminal) | 0.475 / 1.03    | 0.014 / 2.19        | 0.052 / 1.30        | 0.074 / 1.28        | 1.8e-7 / -2.38     | 0.769 / 1.30       |

<sup>6</sup>Datasets were downloaded from NCBI GEO or obtained from Chin et al. (Chin, et al. 2006) and analyzed for gene expression differences between classes based on ER status or molecular subtype: p value (t-test) / fold change, where ratio of average marker expression in ER+/luminal vs. ER-/basal samples in raw expression data (>1 means up-regulation in ER+/luminal, and <-1 means up-regulation in ER-/basal).

| Table S7, related to Figure 5. Metabolomics Results <sup>7</sup> |                                                                   |              |              |              |              |              |             |
|------------------------------------------------------------------|-------------------------------------------------------------------|--------------|--------------|--------------|--------------|--------------|-------------|
| 13C label Source / Time                                          | Metabolite analyzed (+X denotes number of <sup>13</sup> Carbons ) |              |              |              |              |              |             |
|                                                                  | Asp+0                                                             | Asp+1        | Asp+2        | Asp+3        | Asp+4        |              |             |
| 12 hr 13C glutamine                                              | 25.1%                                                             | 10.6%        | 18.0%        | 8.2%         | 38.1%        |              |             |
| 12 hr 13C glutamine                                              | 25.5%                                                             | 10.3%        | 16.0%        | 9.7%         | 38.5%        |              |             |
| 6 hr 13C glutamine                                               | 28.7%                                                             | 8.7%         | 15.7%        | 9.0%         | 37.8%        |              |             |
| <b>average</b>                                                   | <b>26.5%</b>                                                      | <b>9.9%</b>  | <b>16.6%</b> | <b>9.0%</b>  | <b>38.1%</b> |              |             |
| <b>standard deviation</b>                                        | <b>2.0%</b>                                                       | <b>1.0%</b>  | <b>1.2%</b>  | <b>0.8%</b>  | <b>0.3%</b>  |              |             |
|                                                                  | Citrate+0                                                         | Citrate+1    | Citrate+2    | Citrate+3    | Citrate+4    | Citrate+5    | Citrate+6   |
| 12 hr 13C glutamine                                              | 27.4%                                                             | 10.6%        | 18.8%        | 8.8%         | 31.8%        | 2.6%         | 0%          |
| 12 hr 13C glutamine                                              | 29.6%                                                             | 10.8%        | 18.7%        | 5.6%         | 28.9%        | 6.5%         | 0%          |
| 6 hr 13C glutamine                                               | 31.6%                                                             | 7.3%         | 14.4%        | 11.6%        | 33.1%        | 2.0%         | 0%          |
| <b>average</b>                                                   | <b>29.5%</b>                                                      | <b>9.6%</b>  | <b>17.3%</b> | <b>8.7%</b>  | <b>31.3%</b> | <b>3.7%</b>  | <b>0.0%</b> |
| <b>standard deviation</b>                                        | <b>2.1%</b>                                                       | <b>2.0%</b>  | <b>2.5%</b>  | <b>3.0%</b>  | <b>2.2%</b>  | <b>2.4%</b>  | <b>0.0%</b> |
|                                                                  | Glu+0                                                             | Glu+1        | Glu+2        | Glu+3        | Glu+4        | Glu+5        |             |
| 12 hr 13C glutamine                                              | 31.2%                                                             | 4.8%         | 2.4%         | 16.0%        | 3.2%         | 42.3%        |             |
| 12 hr 13C glutamine                                              | 27.0%                                                             | 4.8%         | 3.5%         | 11.6%        | 7.3%         | 45.8%        |             |
| 6 hr 13C glutamine                                               | 24.7%                                                             | 5.3%         | 4.7%         | 14.5%        | 1.9%         | 48.9%        |             |
| <b>average</b>                                                   | <b>27.6%</b>                                                      | <b>5.0%</b>  | <b>3.5%</b>  | <b>14.0%</b> | <b>4.1%</b>  | <b>45.7%</b> |             |
| <b>standard deviation</b>                                        | <b>3.3%</b>                                                       | <b>0.3%</b>  | <b>1.1%</b>  | <b>2.3%</b>  | <b>2.9%</b>  | <b>3.3%</b>  |             |
|                                                                  | Gln+0                                                             | Gln+1        | Gln+2        | Gln+3        | Gln+4        | Gln+5        |             |
| 12 hr 13C glutamine                                              | 17.8%                                                             | 5.4%         | 0.0%         | 0.0%         | 4.2%         | 72.6%        |             |
| 12 hr 13C glutamine                                              | 12.3%                                                             | 1.5%         | 0.0%         | 0.0%         | 5.0%         | 81.2%        |             |
| 6 hr 13C glutamine                                               | 10.2%                                                             | 0.0%         | 0.1%         | 0.8%         | 3.5%         | 85.3%        |             |
| <b>average</b>                                                   | <b>13.4%</b>                                                      | <b>2.3%</b>  | <b>0.0%</b>  | <b>0.3%</b>  | <b>4.2%</b>  | <b>79.7%</b> |             |
| <b>standard deviation</b>                                        | <b>4.0%</b>                                                       | <b>2.8%</b>  | <b>0.1%</b>  | <b>0.5%</b>  | <b>0.7%</b>  | <b>6.5%</b>  |             |
|                                                                  | Malate+0                                                          | Malate+1     | Malate+2     | Malate+3     | Malate+4     |              |             |
| 12 hr 13C glutamine                                              | 26.1%                                                             | 11.4%        | 19.9%        | 6.2%         | 36.4%        |              |             |
| 12 hr 13C glutamine                                              | 24.6%                                                             | 10.5%        | 19.4%        | 6.6%         | 38.8%        |              |             |
| 6 hr 13C glutamine                                               | 26.0%                                                             | 9.4%         | 15.5%        | 9.5%         | 39.6%        |              |             |
| <b>average</b>                                                   | <b>25.6%</b>                                                      | <b>10.4%</b> | <b>18.3%</b> | <b>7.4%</b>  | <b>38.3%</b> |              |             |
| <b>standard deviation</b>                                        | <b>0.8%</b>                                                       | <b>1.0%</b>  | <b>2.4%</b>  | <b>1.8%</b>  | <b>1.6%</b>  |              |             |

<sup>7</sup> Incorporation of <sup>13</sup>C-carbon from exposure to ambient <sup>13</sup>C-5-glutamine by various metabolites as indicated in gray rows, expressed as percent total metabolite pool analyzed. Columns report percent per number of labeled carbons in each substrate pool.

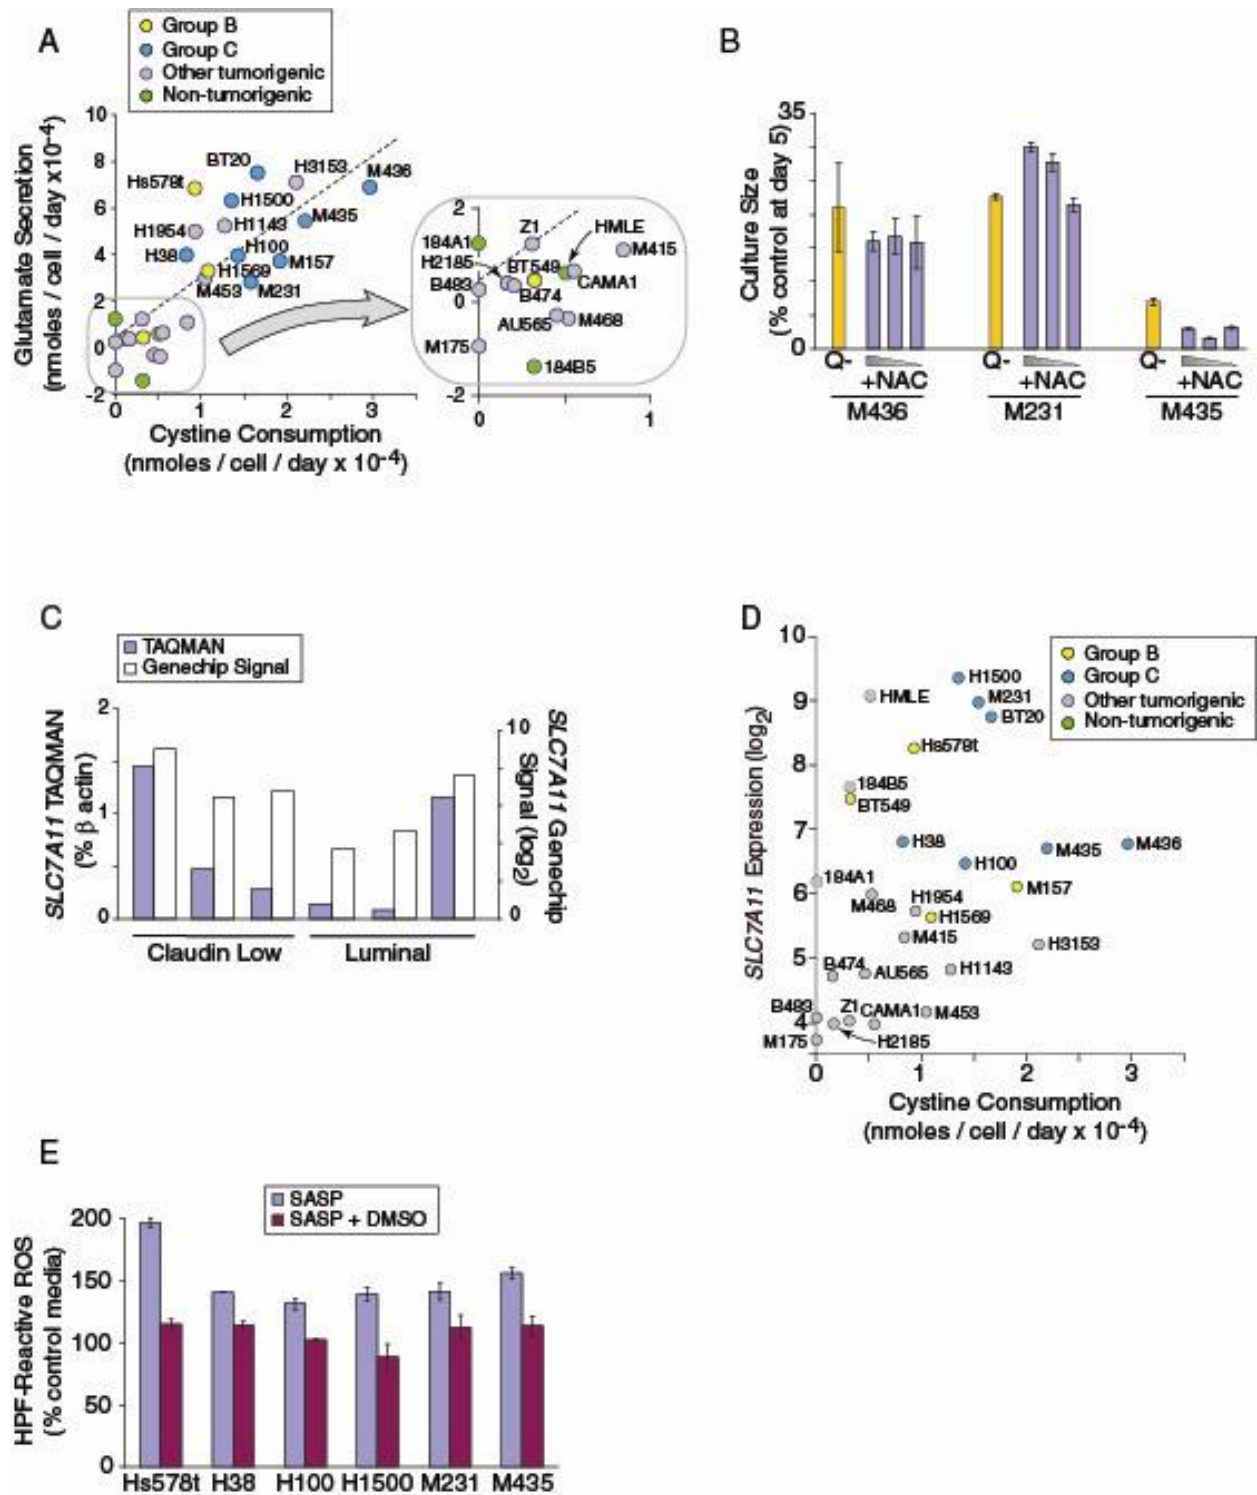

Figure S6, Related to Figure 6. xCT-Mediated Cystine Transport Raises Free Radical Levels in TNBC

Icon codes in figure keys. Icons represent mean values $\pm$ SD. (A) Duplicate of Figure 6A color coded by glutamine restriction group membership illustrating cystine consumption vs. glutamate secretion, derived from HPLC analysis of culture supernatants. (B) N-acetylcystine does not substantially restore culture expansion in the absence of glutamine; 3 exemplar Group C TNBC samples shown; values normalized to parallel cultures in control media; Q-, glutamine free media; NAC, 4-fold titrations of N-acetylcystine from 20mM in glutamine-free media. (C) TAQMAN validation of relative *SLC7A11* Affymetrix genechip signals for representative cells in our panel. (D) Relationship between *SLC7A11* Genechip hybridization signals and cystine consumption, icons coded by glutamine restriction group membership. See figure 6C for coding by molecular subtype. (E) Quantitation of HPF (hydroxyphenylfluorescein) reactivity in response to 300 $\mu$ M SASP treatment, derived from FACS analysis (FL-1 channel detection). Parallel cultures using SASP + 2% DMSO exhibit reduced HPF signal, indicating the specific reduction in hydroxyl radicals (maroon bars).

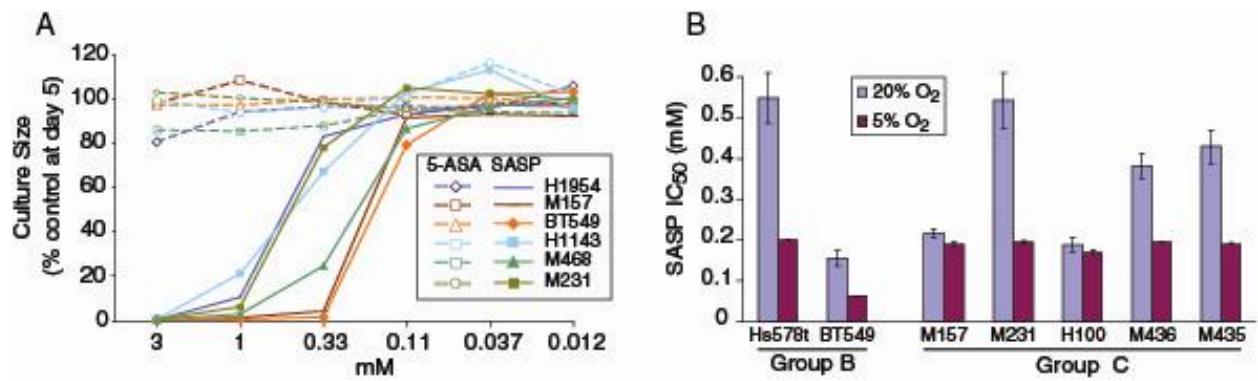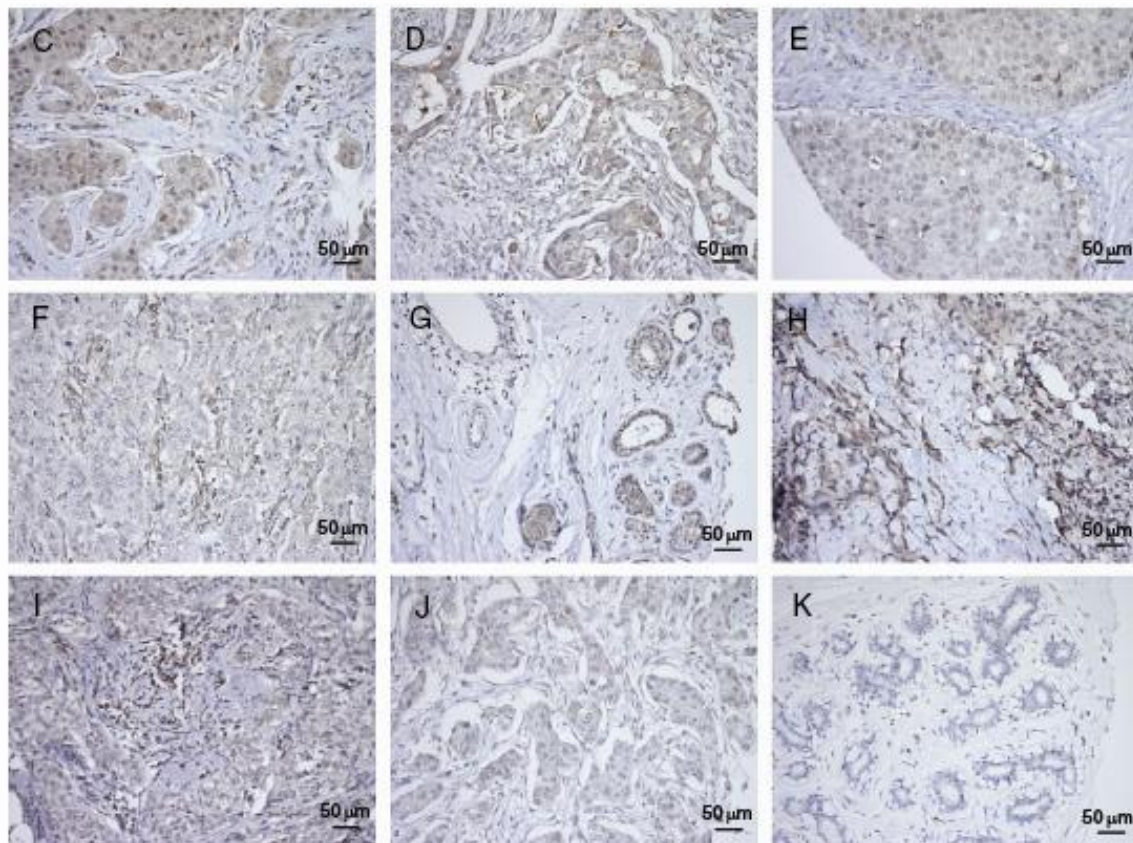

**Figure S7, related to Figure 7. The xCT Transporter is Expressed in Breast Tumors *in vivo*, and is Therapeutically Inhibited by Sulfasalazine**

Icons represent mean values $\pm$ SD. (A) Comparison of SASP and the anti-inflammatory cleavage product 5-ASA for growth attenuation in 6 exemplar basal and claudin low TNBC.

Identical titrations shown, values expressed as % of parallel control media cultures. Open icons



and dotted lines, 5-ASA treatment; closed icons and solid lines, 300 $\mu$ M SASP treatment. B) Comparison of SASP sensitivity in ambient (20%) oxygen (blue bars); vs. tissue normoxia (5% O<sub>2</sub>), maroon bars. (C-K) Staining results showing xCT expression in paraffin sections of anonymous TNBC breast tumors; blue, Hematoxylin (nuclei); brown, horseradish peroxidase (specific anti-xCT stain). (C-I) Images of tumors counted as strong xCT staining. (J) Images of tumor counted as light xCT stain. (K) Normal breast section, with infrequent xCT positive stromal cells.

## **SUPPLEMENTAL EXPERIMENTAL PROCEDURES**

### **Purification of Normal Mammary Epithelial Cells**

Purified from 3 distinct reduction mammoplasties as previously described, collected under IRB approval (Allinen et al., 2004). Briefly, tissue was minced, digested with collagenase I (Sigma C0130) and hyaluronidase (Sigma H3506) 1-2 hrs/37C, washed, filtered through graded pore sized strainers (Tetko, 03-500-47, 03-250-50 and 03-20-14, Fisher 08-771-19 and 08-771-1) to harvest organoids (filter tops). These were trypsinized (5 min/ 37C), filtered (100µm, 40µm, and 20µm mesh), single cell flow through put on Percoll gradients to remove debris and erythrocytes (Percoll-Pharmacia 17-0891-01). Luminal epithelia were purified via anti-BerEP4-conjugated magnetic bead adherence, basal/myoepithelia by anti-CD10-conjugated beads. Cells were immediately frozen on dry ice. Samples were at least 95% pure by PCR.

### **Pleural Effusion Tumor Cell Purification and Analysis**

Patient permission was obtained under IRB approval. Cells were purified by centrifugation, red blood cells lysed, and remainders frozen in aliquots in 10% DMSO/ 90% FBS/ liquid nitrogen. Tumor abundance, purity, and phenotype were determined by immune fluorescence on cytopsin samples using markers of carcinomas, mesothelia, lymphocytes, and endothelia. Cytopsin were fixed/permeabilized in 1% paraformaldehyde/ 0.1% Triton-X 100 or 100% methanol. Antibodies: BD Transduction Labs: Cytokeratin 8, CAM 5.2,1:3; MUC1, 555925; CD44, 550392; Moesin, 610401; E-cadherin, 610181; VE-cadherin, 555289. Zymed: Mesothelin,35-4200; Calretinin, 18-0291; OB-cadherin, 32-1700; N-cadherin, 33-3900. Neomarkers: Vimentin, MS-129-PO; P-cadherin, MS-1741-S0; CD10, MS-973-PO; BerEP4, MS-1851-P0. Novocastra Cytokeratin 8, RTU-CK8-TS1; DAKO, Cytokeratin 17, M7046; CHEMICON Cytokeratin 5/14, CBL267; Sigma Smooth Muscle Actin, F3777; Santa Cruz Biotechnology Estrogen Receptor, SC-8002. Samples with large tumor clumps that excluded contaminating cells were re-

suspended in warm DMEM/10% FBS, applied to 30 $\mu$ m MACS Pre-Separation Filters (Milteny Biotech 130-041-407), filter-top material (tumor clumps) washed 5 times with fresh media on the filter, an aliquot methanol fixed to gauge purity, and the remainder re-suspended in lysis buffer (XB, NuGEN), and frozen on dry ice. SUM86PE: 85% tumor cells, 10% medium sized vimentin<sup>+</sup> cells, remainder small vimentin positive lymphocytes. SUM87PE: Homogenous large epithelial clumps, 0.7% small vimentin positive lymphocytes. SUM 153 PE: Homogenous tumor clumps, 2.6% lymphocytes.

### **Dataset Generation**

RNA was prepared (PicoPure RNA Isolation Kit 0204, Arcturus) from samples described above, from 4 non-tumorigenic human mammary epithelial cell (HMEC)-derived cell lines: (184A1, 184B5, HMLE, HMLE-PR) ([Stampfer, Hallowes et al. 1980](#); [Elenbaas, Spirio et al. 2001](#)), and 10 carcinoma-derived cell lines previously determined by Neve, et. al. ([Neve, 2006](#); "Neve dataset"). Quality was assessed (Agilent Technologies 2100 Bioanalyzer). Labeled cDNA was prepared from 50 ng total RNA (Ovation Biotin RNA Amplification and Labeling System, NuGEN) per manufacturers' instructions, and hybridized to Affymetrix U133A GeneChips using standard procedures developed and performed by the David J. Gladstone Institute Genomics Core, UCSF. Affymetrix image files were normalized (RMA, ([Irizarry et al., 2003](#))), and the resultant log<sub>2</sub> values used to produce the dataset Timmerman\_pico. Datasets merge: The mean hybridization signal for each probeset ID across all samples in the Neve dataset (jmean), and the mean hybridization signal for each probeset ID across the 10 breast cancer derived cell lines (CDL) in the Timmerman\_pico dataset were determined (lmean). Mean value differences between the Timmerman\_pico and Neve datasets were calculated for each probeset ID (jmean-lmean), and added to each sample in the Timmerman\_pico dataset. Values for the 10 duplicated CDL in the resulting merged dataset (Timmerman\_merge) were examined before all subsequent analyses to verify that signal hybridization alterations in the merged dataset were

not due to sample preparation or dataset normalization. Duplicate samples in the Timmerman\_merge dataset derived from the Timmerman\_pico source were then removed before all statistical and bioinformatics-based dataset analyses. Cluster and Treeview software were used (Eisen et al., 1998) to visualize group relationships.

### **Significance Analyses**

Several two class unpaired analyses using Significance Analysis for Microarray EXCEL spreadsheet add in (Tusher et al., 2001) were performed. The first contrasted the purified normal and non-tumorigenic, HMEC-derived samples (the N/I class) against the Carcinoma-derived lines (CDL) plus the purified pleural effusion tumors (PE) samples (the CDL/PE class). We identified 2887 significant Probeset IDs with a median of 0.41 Probeset IDs falsely called; 1631 positively associated and 1256 negatively associated with the CDL/PE (ie: positively associated with the N/I class). More than 28.4% versus 8.0% of all transcripts associated with the CDL/PE versus the N/I group encode molecules involved in intracellular metabolism and other mitochondrial-specific functions. To identify CDL subtype-specific metabolic transcripts, all Probeset IDs associated with metabolic GO descriptions were selected from the Timmerman\_merge dataset, (2003 Probeset IDs in total) and two additional significance analyses were performed, pitting the luminal CDL/PE (the "LUMINAL analysis") and then the basal/mesenchymal CDL (the "BASAL/MES analysis") against all other samples. About 360/760 metabolic probeset IDs identified in the N/I versus CDL/PE significance analysis were re-identified in these two latter analyses, suggesting that almost half (47%) of transcripts identified as CDL/PE-associated are in fact on this list based on alterations in only a subset of the samples, and further strengthening the impression of strong metabolic differences between the luminal and basal/mesenchymal CDL. At highest stringency, about 202 novel probeset IDs with positive, and 31 with negative luminal CDL/PE expression bias were also identified. Similarly, at highest stringency 142 new Probeset IDs with positive basal/mesenchymal CDL

subset expression bias were uniquely identified. Essentially all probeset IDs negatively associated with the basal/mesenchymal CDL class were also positively associated with the luminal CDL/PE in the luminal analysis above (77/86); three remaining probeset IDs were previously positively associated with the N/I clade, providing 6 unique Probeset IDs negatively associated with the basal/mesenchymal clade. These significance analyses have highlighted about 760 Probeset IDs which identify molecules involved in intracellular metabolic processes and mitochondrial functions that are expressed differentially between these 4 classes of samples: the N/I, the CDL/PE, the luminal CDL/PE, and the basal/mesenchymal CDL.

### TP53 Analysis

Using the IARC TP53 Database (<http://p53.iarc.fr/CellLines.aspx>), we found 36 of our cell lines with reliable information on TP53 status. They include 15 luminal, 13 basal, and 8 claudin low samples, 27 with p53 mutations, and 9 wildtype. Of the mutant alleles, 14 have no assessment as to functionality, while the remaining 19 are deemed nonfunctional by various analyses summarized in the database, including protein structure and the ability to transactivate transcription. Of the 36 cell lines, 10 are glutamine sensitive cells (7 Group C and 3 Group B). We did not identify any correlation between p53 status and glutamine dependency. We have included this result in the text.

|         | p53 Mutant | Deleterious / Nonfunctional (no information) | p53 WT | Total |
|---------|------------|----------------------------------------------|--------|-------|
| Luminal | 9          | 8 (1)                                        | 6      | 15    |
| Basal   | 11         | 6 (5)                                        | 2      | 13    |
| Cl. Low | 7          | 5 (2)                                        | 1      | 8     |
| Total   | 27         | 19 (14)                                      | 9      | 36    |

|                            | Mutant vs. WT | Nonfunctional vs. All |
|----------------------------|---------------|-----------------------|
| t-test Group C vs. All p=  | 8.31E-01      | 5.81E-01              |
| t-test GroupC+B vs. All p= | 6.71E-01      | 6.97E-01              |

### DAPI Nuclear Stain

Subconfluent cultures were grown on coverslips, paraformaldehyde fixed (2% / 20 min/room temp), and nuclei stained by standard methods (DAPI, Molecular Probes). Nuclear morphology, mitotic frequency, and apoptotic figure assessment was done by manual cell counts of at least 2000 cells/condition.

### **Quantitative PCR**

RNA samples were prepared (Quiagen RNA Mini Kit) and specific primer/probe mixes used (Assay-on-Demand, Applied Biosystems, or a custom designed IDT PrimeTime Mini qPCR Assay specific for the *hGAC* splice variant) to quantify specific message levels (*TaqMan*, Applied Biosystems PRISM 7900). Exemplar cell lines representing low and high expression were selected for each gene analyzed to validate genechip hybridization variation, or for analysis of expression alterations with glutamine restriction.

For Figures S5B, 4E, 4F, 5H6H: 1.5ug total RNA (NucleoSpin RNAII kit, Macherey-Nagel), was reverse transcribed (iScript, Biorad) per manufacturer's directions. Power SYBR (AB) green PCR reactions performed in triplicate, analyzed with the Step One Plus (AB) sequence detection system. Data quantified against a standard curve, normalized to *TBP* (TATA box binding protein). Primers: *hGAC*: 5' GGAATTCACCTTTTGTACGATC, 5' CTTTCATAGTCCAATGGTCCAAAG; *GLUL*: 5' AAGGTGTGTGGAAGAGTTGCC, 5' TGCTCACCATGTCCATTATC; *xCT*: 5' TGCTGGGCTGATTTTATCTTCG, 5' GAAAGGGCAACCATGAAGAGG; *TBP*: 5' CCCGAAACGCCGAATATAATCC, 5' GACTGTTCTTCACTCTTGGCTC.

### **Western Blot**

RIPA extracts were prepared by standard techniques in the presence of protease and phosphatase inhibitors. 20 µg of lysates were resolved on 4-20% polyacrylamide gels, transferred to PVDF membrane, blocked in 5% BSA/TBST 30 minutes, exposed to primary

antibodies overnight/4C in blocking buffer. Specific hybridization was visualized with HRP-conjugated secondary and chemiluminescence (Amersham RPN2106). Antibodies: AMPK, p-AMPK T-172, ACC, p-ACC S-79, cleaved PARP, retinoblastoma, and phosphorylated retinoblastoma (Cell Signaling); glutaminase (Abnova H00002744-M01); glutamine synthase (Santa Cruz sc-9067); beta actin (Sigma). Glutaminase assembly, Figure S1E; M231 extracts were included on each of 6 separate blots, to normalize signal intensities for the assembly in Photoshop. Duplicate M231 lanes were removed after assembly. Signal intensities were scored as none=1, light=2, strong=3. Pairs of sibling cell lines (asterisks) are counted as one independent isolate (AU565 and SKBR3, MCF7 and LY2).

### **Culture Expansion Assays**

Assays were performed at least 3 times in triplicate, in 96-well format. Relative cell number determined (Cell Titer Glow, Promega), verified by microscopy. Averages reported +/-SD. 96-well format triplicate cultures at  $1-4 \times 10^4$ /ml or, confluent  $1-4 \times 10^5$  /ml, with control, glutamine deficient, (GIBCO 21870, 11960), or 3 or 4-fold serial drug/ nutrient dilutions for 5 days/37°C/5%CO<sub>2</sub>. Highest concentrations: Asparaginase 100 units/ml, DON 5mM, Sulfasalazine 3mM, N-acetylcysteine 10 mM, 5-ASA 3mM, Carboplatin 100µg/ml, Doxorubicin 150ng/ml, Paclitaxel 1.7 mg/ml. Cell cycle, direct cell counts, glucose uptake, Annexin V, ROS detection and siRNA used larger format cultures.

### **Doubling Times**

Cell numbers in triplicate cultures determined by particle counter (Coulter), ATP levels (Cell-Titer Glow, Promega), or trypan blue exclusion. Growth curve calculations used standard techniques.

### **Annexin V / Cell Death Assay**

FACSCalibur (Becton Dickinson) or C6 Flow Cytometer (Accuri). 30,000 cells in triplicate analyzed, mean fluorescence values reported. Annexin V-FITC (Southern Biotechnology 10038-02) and TOTO3 (Molecular Probes T3604), or Propidium Iodide (PI; Molecular Probes, P1304MP) used per manufacturer's protocol. Percent Annexin V positive, PI negative reported.

### **Cell Cycle**

Cultures +/- 18 hrs 100-200nM nocodazole were 70% ethanol fixed, propidium iodide and RNase (5ug/ml) stained using standard techniques. 30,000-100,000 cells were analyzed in triplicate. Cell cycle curve fitting and cell cycle fraction calculations by FLOJO curve fitting software (Tree Star, Inc.).

### **Cell Counts**

Live cell numbers in 30µl determined in triplicate using the C6 Flow Cytometer (Accuri). Manual counts used trypan blue exclusion, in triplicate.

### **SUPPLEMENTAL REFERENCES**

Allinen, M., Beroukhi, R., Cai, L., Brennan, C., Lahti-Domenici, J., Huang, H., Porter, D., Hu, M., Chin, L., Richardson, A., et al. (2004). Molecular characterization of the tumor microenvironment in breast cancer. *Cancer Cell* 6, 17-32.

Elenbaas, B., Spirio, L., Koerner, F., Fleming, M. D., Zimonjic, D. B., Donaher, J. L., Popescu, N. C., Hahn, W. C., and Weinberg, R. A. (2001). Human breast cancer cells generated by oncogenic transformation of primary mammary epithelial cells. *Genes Dev* 15, 50-65.



Stampfer, M., Hallows, R. C., and Hackett, A. J. (1980). Growth of normal human mammary cells in culture. *In Vitro* 16, 415-425.

**Table S2:** Significant Metabolic Probeset IDs. Probeset IDs and significance scores for metab

Significance analysis classes were:

- 1) Purified normal samples plus nontumorigenic, culture adapted cells (N/I) versus carcinoma
- 2) Basal carcinomas versus all other samples (Basal CDL).
- 3) Luminal carcinomas versus all others (Luminal CDL).

| Significant Class Association | Probeset ID | Gene Symbol | Score   |
|-------------------------------|-------------|-------------|---------|
| Basal CDL                     | 201272_at   | AKR1B1      | 5.98627 |
| Basal CDL                     | 221510_s_at | GLS         | 5.87002 |
| Basal CDL                     | 202613_at   | CTPS        | 5.75562 |
| Basal CDL                     | 205260_s_at | ACYP1       | 5.61946 |
| Basal CDL                     | 203909_at   | SLC9A6      | 5.57077 |
| Basal CDL                     | 205996_s_at | AK2         | 5.44375 |
| Basal CDL                     | 200762_at   | DPYSL2      | 5.26941 |
| Basal CDL                     | 220892_s_at | PSAT1       | 5.26622 |
| Basal CDL                     | 202026_at   | SDHD        | 5.19516 |
| Basal CDL                     | 205401_at   | AGPS        | 5.15867 |
| Basal CDL                     | 212174_at   | AK2         | 5.11785 |
| Basal CDL                     | 205565_s_at | FXN         | 5.003   |
| Basal CDL                     | 212604_at   | MRPS31      | 4.92187 |
| Basal CDL                     | 209213_at   | CBR1        | 4.89146 |
| Basal CDL                     | 202589_at   | TYMS        | 4.81951 |
| Basal CDL                     | 201300_s_at | PRNP        | 4.67459 |
| Basal CDL                     | 219079_at   | NCB5OR      | 4.6724  |
| Basal CDL                     | 217294_s_at | ENO1        | 4.67206 |
| Basal CDL                     | 211150_s_at | DLAT        | 4.60905 |
| Basal CDL                     | 219204_s_at | SRR         | 4.57848 |

|           |             |          |         |
|-----------|-------------|----------|---------|
| Basal CDL | 219698_s_at | METTL4   | 4.52715 |
| Basal CDL | 218558_s_at | MRPL39   | 4.49672 |
| Basal CDL | 215535_s_at | AGPAT1   | 4.49345 |
| Basal CDL | 215707_s_at | PRNP     | 4.39831 |
| Basal CDL | 201012_at   | ANXA1    | 4.37549 |
| Basal CDL | 203340_s_at | SLC25A12 | 4.34122 |
| Basal CDL | 221020_s_at | MFTC     | 4.33304 |
| Basal CDL | 205379_at   | CBR3     | 4.33221 |
| Basal CDL | 201968_s_at | PGM1     | 4.30168 |
| Basal CDL | 200978_at   | MDH1     | 4.25182 |
| Basal CDL | 221437_s_at | MRPS15   | 4.19826 |
| Basal CDL | 201634_s_at | CYB5-M   | 4.11264 |
| Basal CDL | 213133_s_at | GCSH     | 4.10644 |
| Basal CDL | 202502_at   | ACADM    | 4.09831 |
| Basal CDL | 219220_x_at | MRPS22   | 4.0809  |
| Basal CDL | 208746_x_at | ATP5L    | 4.03913 |
| Basal CDL | 218982_s_at | MRPS17   | 3.98973 |
| Basal CDL | 202345_s_at | FABP5    | 3.97897 |
| Basal CDL | 214431_at   | GMPS     | 3.96944 |
| Basal CDL | 212568_s_at | DLAT     | 3.95771 |
| Basal CDL | 216705_s_at | ADA      | 3.95428 |
| Basal CDL | 200818_at   | ATP5O    | 3.94961 |
| Basal CDL | 218421_at   | CERK     | 3.94643 |
| Basal CDL | 201633_s_at | CYB5-M   | 3.9291  |
| Basal CDL | 201633_s_at | CYB5-M   | 3.9291  |
| Basal CDL | 205633_s_at | ALAS1    | 3.92187 |

|           |                 |                  |         |
|-----------|-----------------|------------------|---------|
| Basal CDL | 218653_at       | SLC25A15         | 3.92135 |
| Basal CDL | 218096_at       | AGPAT5           | 3.90334 |
| Basal CDL | 202780_at       | OXCT1            | 3.90194 |
| Basal CDL | 209080_x<br>_at | TXNL2            | 3.84647 |
| Basal CDL | 202233_s<br>_at | UQCRH            | 3.8143  |
| Basal CDL | 201030_x<br>_at | LDHB             | 3.78794 |
| Basal CDL | 205194_at       | PSPH             | 3.77857 |
| Basal CDL | 210453_x<br>_at | ATP5L            | 3.7778  |
| Basal CDL | 201571_s<br>_at | DCTD             | 3.77634 |
| Basal CDL | 203401_at       | PRPS2            | 3.77157 |
| Basal CDL | 218357_s<br>_at | TIMM8B           | 3.74203 |
| Basal CDL | 207573_x<br>_at | ATP5L            | 3.72784 |
| Basal CDL | 213564_x<br>_at | LDHB             | 3.67974 |
| Basal CDL | 209773_s<br>_at | RRM2             | 3.67929 |
| Basal CDL | 213302_at       | PFAS             | 3.67311 |
| Basal CDL | 203939_at       | NT5E             | 3.64784 |
| Basal CDL | 208909_at       | UQCRFS1          | 3.63633 |
| Basal CDL | 213149_at       | DLAT             | 3.63593 |
| Basal CDL | 204331_s<br>_at | MRPS12           | 3.62398 |
| Basal CDL | 203033_x<br>_at | FH               | 3.54352 |
| Basal CDL | 208864_s<br>_at | TXN              | 3.51617 |
| Basal CDL | 210008_s<br>_at | MRPS12           | 3.49788 |
| Basal CDL | 218194_at       | DKFZP56<br>6E144 | 3.49414 |
| Basal CDL | 202675_at       | SDHB             | 3.49341 |
| Basal CDL | 218304_s<br>_at | OSBPL11          | 3.48155 |
| Basal CDL | 217772_s<br>_at | MTCH2            | 3.46284 |

|           |             |           |         |
|-----------|-------------|-----------|---------|
| Basal CDL | 212603_at   | MRPS31    | 3.41895 |
| Basal CDL | 213129_s_at | GCSH      | 3.41784 |
| Basal CDL | 209549_s_at | DGUOK     | 3.40776 |
| Basal CDL | 210145_at   | PLA2G4A   | 3.40674 |
| Basal CDL | 209932_s_at | DUT       | 3.38908 |
| Basal CDL | 204639_at   | ADA       | 3.38637 |
| Basal CDL | 212348_s_at | AOF2      | 3.38188 |
| Basal CDL | 208847_s_at | ADH5      | 3.35333 |
| Basal CDL | 216685_s_at | MTAP      | 3.3331  |
| Basal CDL | 218398_at   | MRPS30    | 3.29645 |
| Basal CDL | 201890_at   | RRM2      | 3.28627 |
| Basal CDL | 201231_s_at | ENO1      | 3.24926 |
| Basal CDL | 203095_at   | MTIF2     | 3.24493 |
| Basal CDL | 201757_at   | NDUFS5    | 3.24088 |
| Basal CDL | 218561_s_at | C6orf149  | 3.23635 |
| Basal CDL | 221311_x_at | DJ122O8.2 | 3.23277 |
| Basal CDL | 32836_at    | AGPAT1    | 3.21939 |
| Basal CDL | 214224_s_at | PIN4      | 3.218   |
| Basal CDL | 203816_at   | DGUOK     | 3.21536 |
| Basal CDL | 214126_at   | MCART1    | 3.21528 |
| Basal CDL | 209397_at   | ME2       | 3.21236 |
| Basal CDL | 202715_at   | CAD       | 3.18445 |
| Basal CDL | 210137_s_at | DCTD      | 3.18328 |
| Basal CDL | 208956_x_at | DUT       | 3.18046 |
| Basal CDL | 202799_at   | CLPP      | 3.15989 |
| Basal CDL | 217869_at   | HSD17B12  | 3.15787 |

|           |             |            |         |
|-----------|-------------|------------|---------|
| Basal CDL | 201251_at   | PKM2       | 3.14074 |
| Basal CDL | 204059_s_at | ME1        | 3.13872 |
| Basal CDL | 214170_x_at | FH         | 3.1328  |
| Basal CDL | 201572_x_at | DCTD       | 3.13114 |
| Basal CDL | 209694_at   | PTS        | 3.09748 |
| Basal CDL | 201580_s_at | DJ971N18.2 | 3.09021 |
| Basal CDL | 202096_s_at | BZRP       | 3.07965 |
| Basal CDL | 208967_s_at | AK2        | 3.05353 |
| Basal CDL | 202591_s_at | SSBP1      | 3.04047 |
| Basal CDL | 211363_s_at | MTAP       | 3.03526 |
| Basal CDL | 201351_s_at | YME1L1     | 3.00696 |
| Basal CDL | 209003_at   | SLC25A11   | 2.99378 |
| Basal CDL | 209003_at   | SLC25A11   | 2.99378 |
| Basal CDL | 204172_at   | CPOX       | 2.99128 |
| Basal CDL | 212175_s_at | AK2        | 2.98863 |
| Basal CDL | 202325_s_at | ATP5J      | 2.96828 |
| Basal CDL | 202533_s_at | DHFR       | 2.96259 |
| Basal CDL | 218119_at   | TIMM23     | 2.95413 |
| Basal CDL | 213011_s_at | TPI1       | 2.95235 |
| Basal CDL | 204646_at   | DPYD       | 2.94968 |
| Basal CDL | 205480_s_at | UGP2       | 2.93815 |
| Basal CDL | 219489_s_at | NXN        | 2.93324 |
| Basal CDL | 217989_at   | DHRS8      | 2.92549 |
| Basal CDL | 209513_s_at | HSDL2      | 2.92029 |
| Basal CDL | 218118_s_at | TIMM23     | 2.91867 |
| Basal CDL | 203282_at   | GBE1       | 2.9065  |

|           |                 |               |         |
|-----------|-----------------|---------------|---------|
| Basal CDL | 203646_at       | FDX1          | 2.89695 |
| Basal CDL | 210154_at       | ME2           | 2.89572 |
| Basal CDL | 203465_at       | MRPL19        | 2.89442 |
| Basal CDL | 222014_x<br>_at | MTO1          | 2.88843 |
| Basal CDL | 217960_s<br>_at | TOMM22        | 2.88828 |
| Basal CDL | 203339_at       | SLC25A12      | 2.88797 |
| Basal CDL | 203093_s<br>_at | TIMM44        | 2.87839 |
| Basal CDL | 219974_x<br>_at | ECHDC1        | 2.87092 |
| Basal CDL | 221692_s<br>_at | MRPL34        | 2.86268 |
| Basal CDL | 205412_at       | ACAT1         | 2.86205 |
| Basal CDL | 203925_at       | GCLM          | 2.86029 |
| Basal CDL | 209645_s<br>_at | ALDH1B1       | 2.83086 |
| Basal CDL | 219821_s<br>_at | GFOD1         | 2.80667 |
| Basal CDL | 208969_at       | NDUFA9        | 2.80098 |
| Basal CDL | 212816_s<br>_at | CBS           | 2.79961 |
| Basal CDL | 216574_s<br>_at | RPE           | 2.79858 |
| Basal CDL | 216304_x<br>_at | YME1L1        | 2.79574 |
| Basal CDL | 203663_s<br>_at | COX5A         | 2.77514 |
| Basal CDL | 203746_s<br>_at | HCCS          | 2.76862 |
| Basal CDL | 218716_x<br>_at | MTO1          | 2.76261 |
| Basal CDL | 202075_s<br>_at | PLTP          | 2.75648 |
| Basal CDL | 200955_at       | IMMT          | 2.75378 |
| Basal CDL | 221920_s<br>_at | MSCP          | 2.75283 |
| Basal CDL | 214452_at       | BCAT1         | 2.74809 |
| Basal CDL | 221575_at       | SCLY          | 2.74167 |
| Basal CDL | 40472_at        | LOC2545<br>31 | 2.73999 |

|           |             |                         |         |
|-----------|-------------|-------------------------|---------|
| Basal CDL | 200824_at   | GSTP1                   | 2.7365  |
| Basal CDL | 211755_s_at | ATP5F1                  | 2.71942 |
| Basal CDL | 211653_x_at | AKR1C2                  | 2.69955 |
| Basal CDL | 205133_s_at | HSPE1                   | 2.69712 |
| Basal CDL | 208447_s_at | PRPS1                   | 2.69464 |
| Basal CDL | 209512_at   | HSDL2                   | 2.69371 |
| Basal CDL | 203032_s_at | FH                      | 2.69274 |
| Basal CDL | 200822_x_at | TPI1                    | 2.67173 |
| Basal CDL | 205100_at   | GFPT2                   | 2.66971 |
| Basal CDL | 200903_s_at | AHCY                    | 2.66868 |
| Basal CDL | 203092_at   | TIMM44                  | 2.66665 |
| Basal CDL | 216594_x_at | AKR1C1<br>///<br>AKR1C2 | 2.66076 |
| Basal CDL | 207088_s_at | SLC25A11                | 2.65863 |
| Basal CDL | 207088_s_at | SLC25A11                | 2.65863 |
| Basal CDL | 202839_s_at | NDUFB7                  | 2.65571 |
| Basal CDL | 210153_s_at | ME2                     | 2.65567 |
| Basal CDL | 201554_x_at | GYG                     | 2.65484 |
| Basal CDL | 221641_s_at | ACATE2                  | 2.64544 |
| Basal CDL | 207508_at   | ATP5G3                  | 2.64205 |
| Basal CDL | 204571_x_at | PIN4                    | 2.63997 |
| Basal CDL | 212230_at   | PPAP2B                  | 2.62178 |
|           |             |                         |         |
| CDL/PE    | 209773_s_at | RRM2                    | 10.8628 |
| CDL/PE    | 202532_s_at | DHFR                    | 10.654  |
| CDL/PE    | 201890_at   | RRM2                    | 10.6239 |
| CDL/PE    | 48808_at    | DHFR                    | 10.2799 |
| CDL/PE    | 203800_s_at | MRPS14                  | 9.33279 |



|        |                           |          |         |
|--------|---------------------------|----------|---------|
| CDL/PE | 207507_s_at               | ATP5G3   | 9.02103 |
| CDL/PE | 205711_x_at               | ATP5C1   | 8.74684 |
| CDL/PE | 208870_x_at               | ATP5C1   | 8.72223 |
| CDL/PE | 201441_at                 | COX6B1   | 8.5811  |
| CDL/PE | 207508_at                 | ATP5G3   | 8.51842 |
| CDL/PE | 202534_x_at               | DHFR     | 8.43275 |
| CDL/PE | 203621_at                 | NDUFB5   | 8.38446 |
| CDL/PE | 213366_x_at               | ATP5C1   | 8.36107 |
| CDL/PE | 218226_s_at               | NDUFB4   | 8.33941 |
| CDL/PE | 218654_s_at               | MRPS33   | 8.31032 |
| CDL/PE | AFFX-HUMGAPDH/M33197_5_at | GAPD     | 8.16007 |
| CDL/PE | 202330_s_at               | UNG      | 7.97723 |
| CDL/PE | 210519_s_at               | NQO1     | 7.97362 |
| CDL/PE | 208846_s_at               | VDAC3    | 7.93474 |
| CDL/PE | 218487_at                 | ALAD     | 7.92366 |
| CDL/PE | 218281_at                 | MRPL48   | 7.88875 |
| CDL/PE | 201467_s_at               | NQO1     | 7.87832 |
| CDL/PE | 200978_at                 | MDH1     | 7.85666 |
| CDL/PE | 201619_at                 | PRDX3    | 7.84115 |
| CDL/PE | 217772_s_at               | MTCH2    | 7.81773 |
| CDL/PE | 202589_at                 | TYMS     | 7.68481 |
| CDL/PE | 217900_at                 | FLJ10326 | 7.66872 |
| CDL/PE | 202343_x_at               | COX5B    | 7.65156 |
| CDL/PE | 218190_s_at               | HSPC051  | 7.54489 |
| CDL/PE | 218653_at                 | SLC25A15 | 7.53444 |
| CDL/PE | 201468_s_at               | NQO1     | 7.48672 |

|        |                 |          |         |
|--------|-----------------|----------|---------|
| CDL/PE | 203033_x<br>_at | FH       | 7.44056 |
| CDL/PE | 202004_x<br>_at | SDHC     | 7.43423 |
| CDL/PE | 203115_at       | FECH     | 7.43319 |
| CDL/PE | 209389_x<br>_at | DBI      | 7.39473 |
| CDL/PE | 203371_s<br>_at | NDUFB3   | 7.30297 |
| CDL/PE | 209065_at       | UQCRB    | 7.28158 |
| CDL/PE | 218123_at       | C21orf59 | 7.23894 |
| CDL/PE | 200681_at       | GLO1     | 7.20366 |
| CDL/PE | 208955_at       | DUT      | 7.15619 |
| CDL/PE | 211025_x<br>_at | COX5B    | 7.10221 |
| CDL/PE | 212510_at       | GPD1L    | 7.06155 |
| CDL/PE | 202839_s<br>_at | NDUFB7   | 7.04311 |
| CDL/PE | 201339_s<br>_at | SCP2     | 7.03262 |
| CDL/PE | 209095_at       | DLD      | 7.0322  |
| CDL/PE | 215088_s<br>_at | SDHC     | 6.99589 |
| CDL/PE | 201570_at       | CGI-51   | 6.98386 |
| CDL/PE | 212694_s<br>_at | PCCB     | 6.9114  |
| CDL/PE | 208758_at       | ATIC     | 6.89689 |
| CDL/PE | 219819_s<br>_at | MRPS28   | 6.89425 |
| CDL/PE | 213735_s<br>_at | COX5B    | 6.85877 |
| CDL/PE | 209932_s<br>_at | DUT      | 6.82652 |
| CDL/PE | 211070_x<br>_at | DBI      | 6.74209 |
| CDL/PE | 209224_s<br>_at | NDUFA2   | 6.72243 |
| CDL/PE | 218049_s<br>_at | MRPL13   | 6.70644 |
| CDL/PE | 203189_s<br>_at | NDUFS8   | 6.6721  |
| CDL/PE | 210149_s<br>_at | ATP5H    | 6.66799 |

|        |             |          |         |
|--------|-------------|----------|---------|
| CDL/PE | 206790_s_at | NDUFB1   | 6.53425 |
| CDL/PE | 218160_at   | NDUFA8   | 6.51972 |
| CDL/PE | 203775_at   | SLC25A13 | 6.48951 |
| CDL/PE | 201118_at   | PGD      | 6.47059 |
| CDL/PE | 218185_s_at | ARMC1    | 6.46399 |
| CDL/PE | 212581_x_at | GAPD     | 6.45408 |
| CDL/PE | 218538_s_at | MRS2L    | 6.43773 |
| CDL/PE | 202325_s_at | ATP5J    | 6.42699 |
| CDL/PE | 202891_at   | NIT1     | 6.39469 |
| CDL/PE | 202233_s_at | UQCRH    | 6.33703 |
| CDL/PE | 217919_s_at | MRPL42   | 6.31574 |
| CDL/PE | 210532_s_at | C14orf2  | 6.30751 |
| CDL/PE | 217398_x_at | GAPD     | 6.29822 |
| CDL/PE | 201135_at   | ECHS1    | 6.29196 |
| CDL/PE | 204571_x_at | PIN4     | 6.26811 |
| CDL/PE | 200955_at   | IMMT     | 6.26254 |
| CDL/PE | 202309_at   | MTHFD1   | 6.25828 |
| CDL/PE | 218569_s_at | KBTBD4   | 6.23281 |
| CDL/PE | 209143_s_at | CLNS1A   | 6.20854 |
| CDL/PE | 209623_at   | MCCC2    | 6.13536 |
| CDL/PE | 210296_s_at | PXMP3    | 6.13316 |
| CDL/PE | 218046_s_at | MRPS16   | 6.11707 |
| CDL/PE | 214259_s_at | AKR7A2   | 6.10598 |
| CDL/PE | 213453_x_at | GAPD     | 6.07241 |
| CDL/PE | 201432_at   | CAT      | 6.07066 |
| CDL/PE | 201754_at   | COX6C    | 6.05975 |

|        |             |          |         |
|--------|-------------|----------|---------|
| CDL/PE | 211569_s_at | HADHSC   | 6.05736 |
| CDL/PE | 207573_x_at | ATP5L    | 6.01631 |
| CDL/PE | 202533_s_at | DHFR     | 6.00827 |
| CDL/PE | 201119_s_at | COX8A    | 5.99026 |
| CDL/PE | 214170_x_at | FH       | 5.99016 |
| CDL/PE | 214224_s_at | PIN4     | 5.98443 |
| CDL/PE | 221693_s_at | MRPS18A  | 5.95308 |
| CDL/PE | 201193_at   | IDH1     | 5.94542 |
| CDL/PE | 208911_s_at | PDHB     | 5.92649 |
| CDL/PE | 202961_s_at | ATP5J2   | 5.92101 |
| CDL/PE | 209036_s_at | MDH2     | 5.90577 |
| CDL/PE | 209036_s_at | MDH2     | 5.90577 |
| CDL/PE | 205412_at   | ACAT1    | 5.90472 |
| CDL/PE | 203560_at   | GGH      | 5.89133 |
| CDL/PE | 218970_s_at | CUTC     | 5.85822 |
| CDL/PE | 202428_x_at | DBI      | 5.84472 |
| CDL/PE | 201554_x_at | GYG      | 5.80668 |
| CDL/PE | 218119_at   | TIMM23   | 5.7886  |
| CDL/PE | 209916_at   | DHTKD1   | 5.76577 |
| CDL/PE | 221770_at   | RPE      | 5.7633  |
| CDL/PE | 209003_at   | SLC25A11 | 5.7461  |
| CDL/PE | 213133_s_at | GCSH     | 5.73697 |
| CDL/PE | 204587_at   | SLC25A14 | 5.7114  |
| CDL/PE | 203606_at   | NDUFS6   | 5.69863 |
| CDL/PE | 201563_at   | SORD     | 5.69013 |
| CDL/PE | 201740_at   | NDUFS3   | 5.6662  |

|        |             |           |         |
|--------|-------------|-----------|---------|
| CDL/PE | 211023_at   | PDHB      | 5.6576  |
| CDL/PE | 208699_x_at | TKT       | 5.65445 |
| CDL/PE | 210453_x_at | ATP5L     | 5.64774 |
| CDL/PE | 200818_at   | ATP5O     | 5.637   |
| CDL/PE | 205379_at   | CBR3      | 5.6335  |
| CDL/PE | 218270_at   | MRPL24    | 5.62883 |
| CDL/PE | 202077_at   | NDUFAB1   | 5.60333 |
| CDL/PE | 201568_at   | QP-C      | 5.59701 |
| CDL/PE | 210045_at   | IDH2      | 5.57074 |
| CDL/PE | 208308_s_at | GPI       | 5.56375 |
| CDL/PE | 219180_s_at | PEX26     | 5.56363 |
| CDL/PE | 208746_x_at | ATP5L     | 5.56309 |
| CDL/PE | 211595_s_at | MRPS11    | 5.55952 |
| CDL/PE | 217140_s_at | VDAC1     | 5.53691 |
| CDL/PE | 217949_s_at | VKORC1    | 5.53684 |
| CDL/PE | 208998_at   | UCP2      | 5.51829 |
| CDL/PE | 201966_at   | NDUFS2    | 5.4909  |
| CDL/PE | 209066_x_at | UQCRB     | 5.49073 |
| CDL/PE | 202298_at   | NDUFA1    | 5.48698 |
| CDL/PE | 217874_at   | SUCLG1    | 5.47869 |
| CDL/PE | 203190_at   | NDUFS8    | 5.46842 |
| CDL/PE | 221311_x_at | DJ122O8.2 | 5.4674  |
| CDL/PE | 203465_at   | MRPL19    | 5.45744 |
| CDL/PE | 202090_s_at | UQCR      | 5.43746 |
| CDL/PE | 213149_at   | DLD       | 5.4196  |
| CDL/PE | 211755_s_at | ATP5F1    | 5.41378 |

|        |             |          |         |
|--------|-------------|----------|---------|
| CDL/PE | 209512_at   | HSDL2    | 5.4106  |
| CDL/PE | 320_at      | PEX6     | 5.40459 |
| CDL/PE | 208956_x_at | DUT      | 5.39313 |
| CDL/PE | 204179_at   | MB       | 5.37104 |
| CDL/PE | 201134_x_at | COX7C    | 5.36631 |
| CDL/PE | 202929_s_at | DDT      | 5.34804 |
| CDL/PE | 202596_at   | ENSA     | 5.29692 |
| CDL/PE | 208972_s_at | ATP5G1   | 5.27146 |
| CDL/PE | 202502_at   | ACADM    | 5.26622 |
| CDL/PE | 201035_s_at | HADHSC   | 5.25843 |
| CDL/PE | 203608_at   | ALDH5A1  | 5.2567  |
| CDL/PE | 211855_s_at | SLC25A14 | 5.23562 |
| CDL/PE | 218392_x_at | SFXN1    | 5.22353 |
| CDL/PE | 218212_s_at | MOCS2    | 5.21545 |
| CDL/PE | 213846_at   | COX7C    | 5.20715 |
| CDL/PE | 217356_s_at | PGK1     | 5.19513 |
| CDL/PE | 204386_s_at | MRP63    | 5.18829 |
| CDL/PE | 218570_at   | KBTBD4   | 5.18628 |
| CDL/PE | 201403_s_at | MGST3    | 5.18033 |
| CDL/PE | 201931_at   | ETFA     | 5.17684 |
| CDL/PE | 208907_s_at | MRPS18B  | 5.16993 |
| CDL/PE | 201816_s_at | GBAS     | 5.1694  |
| CDL/PE | 222216_s_at | MRPL17   | 5.12853 |
| CDL/PE | 203032_s_at | FH       | 5.12455 |
| CDL/PE | 211733_x_at | SCP2     | 5.10087 |
| CDL/PE | 209513_s_at | HSDL2    | 5.09824 |
| CDL/PE | 216591_s_at | SDHC     | 5.07941 |

|        |                 |         |         |
|--------|-----------------|---------|---------|
| CDL/PE | 219162_s<br>_at | MRPL11  | 5.05494 |
| CDL/PE | 214431_at       | GMPS    | 5.05144 |
| CDL/PE | 201612_at       | ALDH9A1 | 5.04746 |
| CDL/PE | 208881_x<br>_at | IDI1    | 5.04267 |
| CDL/PE | 201463_s<br>_at | TALDO1  | 5.04027 |
| CDL/PE | 201956_s<br>_at | GNPAT   | 5.02542 |
| CDL/PE | 208745_at       | ATP5L   | 5.022   |
| CDL/PE | 201717_at       | MRPL49  | 5.0101  |
| CDL/PE | 218536_at       | MRS2L   | 4.99842 |
| CDL/PE | 200883_at       | UQCRC2  | 4.99646 |
| CDL/PE | 202338_at       | TK1     | 4.96768 |
| CDL/PE | 218357_s<br>_at | TIMM8B  | 4.95827 |
| CDL/PE | 208847_s<br>_at | ADH5    | 4.9487  |
| CDL/PE | 218025_s<br>_at | PECI    | 4.94539 |
| CDL/PE | 211576_s<br>_at | SLC19A1 | 4.93948 |
| CDL/PE | 202125_s<br>_at | ALS2CR3 | 4.92749 |
| CDL/PE | 213738_s<br>_at | ATP5A1  | 4.89749 |
| CDL/PE | 212568_s<br>_at | DLAT    | 4.88132 |
| CDL/PE | 200961_at       | SEPHS2  | 4.87968 |
| CDL/PE | 201275_at       | FDPS    | 4.8749  |
| CDL/PE | 201066_at       | CYC1    | 4.87473 |
| CDL/PE | 201036_s<br>_at | HADHSC  | 4.85339 |
| CDL/PE | 201226_at       | NDUFB8  | 4.84149 |
| CDL/PE | 217773_s<br>_at | NDUFA4  | 4.83543 |
| CDL/PE | 218111_s<br>_at | CMAS    | 4.8331  |
| CDL/PE | 209608_s<br>_at | ACAT2   | 4.82997 |

|        |             |          |         |
|--------|-------------|----------|---------|
| CDL/PE | 219547_at   | COX15    | 4.82312 |
| CDL/PE | 200980_s_at | PDHA1    | 4.82294 |
| CDL/PE | 203008_x_at | TXNDC9   | 4.81456 |
| CDL/PE | 202322_s_at | GGPS1    | 4.79853 |
| CDL/PE | 201707_at   | PEX19    | 4.7977  |
| CDL/PE | 203633_at   | CPT1A    | 4.79486 |
| CDL/PE | 203517_at   | MTX2     | 4.7894  |
| CDL/PE | 217980_s_at | MRPL16   | 4.78651 |
| CDL/PE | 211758_x_at | TXNDC9   | 4.77316 |
| CDL/PE | 214864_s_at | GRHPR    | 4.75199 |
| CDL/PE | 203228_at   | PAFAH1B3 | 4.74941 |
| CDL/PE | 203458_at   | SPR      | 4.73813 |
| CDL/PE | 203039_s_at | NDUFS1   | 4.73803 |
| CDL/PE | 217956_s_at | MASA     | 4.73069 |
| CDL/PE | 218440_at   | MCCC1    | 4.72114 |
| CDL/PE | 219553_at   | NME7     | 4.70644 |
| CDL/PE | 200982_s_at | ANXA6    | 4.70606 |
| CDL/PE | 210589_s_at | GBA      | 4.69109 |
| CDL/PE | 205849_s_at | UQCRB    | 4.67962 |
| CDL/PE | 218421_at   | CERK     | 4.64475 |
| CDL/PE | 208764_s_at | ATP5G2   | 4.62834 |
| CDL/PE | 202735_at   | EBP      | 4.61414 |
| CDL/PE | 213787_s_at | EBP      | 4.60925 |
| CDL/PE | 209077_at   | TXN2     | 4.60654 |
| CDL/PE | 204615_x_at | IDI1     | 4.58037 |
| CDL/PE | 218168_s_at | CABC1    | 4.57854 |



|        |             |          |         |
|--------|-------------|----------|---------|
| CDL/PE | 208717_at   | OXA1L    | 4.57341 |
| CDL/PE | 219080_s_at | CTPS2    | 4.57126 |
| CDL/PE | 213129_s_at | GCSH     | 4.56841 |
| CDL/PE | 218890_x_at | MRPL35   | 4.56196 |
| CDL/PE | 216574_s_at | RPE      | 4.55979 |
| CDL/PE | 218988_at   | SLC35E3  | 4.5569  |
| CDL/PE | 204160_s_at | ENPP4    | 4.55661 |
| CDL/PE | 202698_x_at | COX411   | 4.53744 |
| CDL/PE | 201634_s_at | CYB5-M   | 4.53312 |
| CDL/PE | 217491_x_at | COX7C    | 4.5318  |
| CDL/PE | 200642_at   | SOD1     | 4.52906 |
| CDL/PE | 201706_s_at | PEX19    | 4.52896 |
| CDL/PE | 200925_at   | COX6A1   | 4.5264  |
| CDL/PE | 201093_x_at | SDHA     | 4.51236 |
| CDL/PE | 209600_s_at | ACOX1    | 4.51209 |
| CDL/PE | 201014_s_at | PAICS    | 4.50623 |
| CDL/PE | 218112_at   | MRPS34   | 4.49778 |
| CDL/PE | 202812_at   | GAA      | 4.49139 |
| CDL/PE | 212461_at   | OAZIN    | 4.48542 |
| CDL/PE | 221909_at   | FLJ14627 | 4.48198 |
| CDL/PE | 203031_s_at | UROS     | 4.48036 |
| CDL/PE | 202831_at   | GPX2     | 4.47156 |
| CDL/PE | 212145_at   | MRPS27   | 4.46495 |
| CDL/PE | 212604_at   | MRPS31   | 4.44918 |
| CDL/PE | 218671_s_at | ATPIF1   | 4.44572 |
| CDL/PE | 207335_x_at | ATP5I    | 4.44359 |

|        |             |                   |         |
|--------|-------------|-------------------|---------|
| CDL/PE | 218557_at   | NIT2              | 4.43301 |
| CDL/PE | 215695_s_at | GYG2              | 4.43278 |
| CDL/PE | 217776_at   | RDH11             | 4.43099 |
| CDL/PE | 202144_s_at | ADSL              | 4.42838 |
| CDL/PE | 205012_s_at | HAGH              | 4.42813 |
| CDL/PE | 201569_s_at | CGI-51            | 4.4147  |
| CDL/PE | 218563_at   | NDUFA3            | 4.41184 |
| CDL/PE | 214830_at   | SLC38A6           | 4.40571 |
| CDL/PE | 202856_s_at | SLC16A3           | 4.39645 |
| CDL/PE | 200657_at   | SLC25A5           | 4.39494 |
| CDL/PE | 201347_x_at | GRHPR             | 4.39393 |
| CDL/PE | 218408_at   | TIMM10            | 4.38764 |
| CDL/PE | 211658_at   | PRDX2             | 4.38176 |
| CDL/PE | 208845_at   | VDAC3             | 4.38026 |
| CDL/PE | 203192_at   | ABCB6             | 4.37056 |
| CDL/PE | 203832_at   | ENO1 ///<br>SNRPF | 4.36891 |
| CDL/PE | 211727_s_at | COX11             | 4.36338 |
| CDL/PE | 203116_s_at | FECH              | 4.3561  |
| CDL/PE | 210820_x_at | COQ7              | 4.34379 |
| CDL/PE | 201818_at   | FLJ12443          | 4.33402 |
| CDL/PE | 202675_at   | SDHB              | 4.31931 |
| CDL/PE | 209492_x_at | ATP5I             | 4.30994 |
| CDL/PE | 220741_s_at | PPA2              | 4.30049 |
| CDL/PE | 201923_at   | PRDX4             | 4.28483 |
| CDL/PE | 204300_at   | PET112L           | 4.27924 |
| CDL/PE | 208700_s_at | TKT               | 4.27649 |

|        |                 |          |         |
|--------|-----------------|----------|---------|
| CDL/PE | 217932_at       | MRPS7    | 4.27467 |
| CDL/PE | 208787_at       | MRPL3    | 4.25503 |
| CDL/PE | 221589_s<br>_at | ALDH6A1  | 4.25332 |
| CDL/PE | 209836_x<br>_at | LAT1-3TM | 4.25134 |
| CDL/PE | 204788_s<br>_at | PPOX     | 4.24924 |
| CDL/PE | 212038_s<br>_at | VDAC1    | 4.23098 |
| CDL/PE | 212213_x<br>_at | OPA1     | 4.22968 |
| CDL/PE | 219401_at       | XYLT2    | 4.22299 |
| CDL/PE | 216308_x<br>_at | GRHPR    | 4.21926 |
| CDL/PE | 218609_s<br>_at | NUDT2    | 4.21533 |
| CDL/PE | 202053_s<br>_at | ALDH3A2  | 4.21423 |
| CDL/PE | 219055_at       | FLJ10379 | 4.20338 |
| CDL/PE | 209078_s<br>_at | TXN2     | 4.20235 |
| CDL/PE | 212198_s<br>_at | TM9SF4   | 4.20202 |
| CDL/PE | 208714_at       | NDUFV1   | 4.196   |
| CDL/PE | 202026_at       | SDHD     | 4.19114 |
| CDL/PE | 204942_s<br>_at | ALDH3B2  | 4.17863 |
| CDL/PE | 203551_s<br>_at | COX11    | 4.16862 |
| CDL/PE | 209275_s<br>_at | CLN3     | 4.15634 |
| CDL/PE | 202593_s<br>_at | MIR16    | 4.15356 |
| CDL/PE | 217294_s<br>_at | ENO1     | 4.15326 |
| CDL/PE | 209380_s<br>_at | ABCC5    | 4.1432  |
| CDL/PE | 213333_at       | MDH2     | 4.14275 |
| CDL/PE | 213333_at       | MDH2     | 4.14275 |
| CDL/PE | 208909_at       | UQCRFS1  | 4.13653 |
| CDL/PE | 200831_s<br>_at | SCD      | 4.1262  |

|        |                 |         |         |
|--------|-----------------|---------|---------|
| CDL/PE | 212449_s<br>_at | LYPLA1  | 4.1216  |
| CDL/PE | 217942_at       | MRPS35  | 4.10413 |
| CDL/PE | 212322_at       | SGPL1   | 4.09203 |
| CDL/PE | 201597_at       | COX7A2  | 4.08596 |
| CDL/PE | 218118_s<br>_at | TIMM23  | 4.07447 |
| CDL/PE | 218200_s<br>_at | NDUFB2  | 4.07154 |
| CDL/PE | 211594_s<br>_at | MRPL9   | 4.06981 |
| CDL/PE | 211275_s<br>_at | GYG     | 4.03767 |
| CDL/PE | 221024_s<br>_at | SLC2A10 | 4.01948 |
| CDL/PE | 221437_s<br>_at | MRPS15  | 3.98776 |
| CDL/PE | 201576_s<br>_at | GLB1    | 3.98717 |
| CDL/PE | 218547_at       | DHDDS   | 3.98179 |
| CDL/PE | 209218_at       | SQLE    | 3.96931 |
| CDL/PE | 208817_at       | COMT    | 3.95891 |
| CDL/PE | 212083_at       | TEX261  | 3.95125 |
| CDL/PE | 203774_at       | MTR     | 3.94506 |
| CDL/PE | 202706_s<br>_at | UMPS    | 3.93836 |
| CDL/PE | 202471_s<br>_at | IDH3G   | 3.93659 |
| CDL/PE | 209522_s<br>_at | CRAT    | 3.93456 |
| CDL/PE | 203067_at       | PDHX    | 3.92396 |
| CDL/PE | 203880_at       | COX17   | 3.90896 |
| CDL/PE | 203663_s<br>_at | COX5A   | 3.90111 |
| CDL/PE | 210250_x<br>_at | ADSL    | 3.89683 |
| CDL/PE | 205851_at       | NME6    | 3.89226 |
| CDL/PE | 203478_at       | NDUFC1  | 3.87903 |
| CDL/PE | 217408_at       | MRPS18B | 3.87823 |

|        |             |         |         |
|--------|-------------|---------|---------|
| CDL/PE | 202054_s_at | ALDH3A2 | 3.87425 |
| CDL/PE | 204067_at   | SUOX    | 3.87375 |
| CDL/PE | 201106_at   | GPX4    | 3.86668 |
| CDL/PE | 206348_s_at | PDK3    | 3.86451 |
| CDL/PE | 202785_at   | NDUFA7  | 3.84554 |
| CDL/PE | 221927_s_at | ABHD11  | 3.8452  |
| CDL/PE | 219076_s_at | PXMP2   | 3.84026 |
| CDL/PE | 218027_at   | MRPL15  | 3.83116 |
| CDL/PE | 218101_s_at | NDUFC2  | 3.82931 |
| CDL/PE | 213106_at   | ATP8A1  | 3.82693 |
| CDL/PE | 200086_s_at | COX4I1  | 3.82303 |
| CDL/PE | 218316_at   | TIMM9   | 3.81526 |
| CDL/PE | 202908_at   | WFS1    | 3.80852 |
| CDL/PE | 203040_s_at | HMBS    | 3.8012  |
| CDL/PE | 207332_s_at | TFRC    | 3.78436 |
| CDL/PE | 209094_at   | DDAH1   | 3.76539 |
| CDL/PE | 200903_s_at | AHCY    | 3.76207 |
| CDL/PE | 209426_s_at | AMACR   | 3.74654 |
| CDL/PE | 202279_at   | C14orf2 | 3.73983 |
| CDL/PE | 33646_g_at  | GM2A    | 3.73729 |
| CDL/PE | 208997_s_at | UCP2    | 3.72751 |
| CDL/PE | 204282_s_at | FARS2   | 3.72055 |
| CDL/PE | 217846_at   | QARS    | 3.69998 |
| CDL/PE | 218433_at   | PANK3   | 3.69013 |
| CDL/PE | 202017_at   | EPHX1   | 3.68973 |
| CDL/PE | 218339_at   | MRPL22  | 3.6799  |

|        |                 |              |         |
|--------|-----------------|--------------|---------|
| CDL/PE | 209609_s<br>_at | MRPL9        | 3.67951 |
| CDL/PE | 221585_at       | CACNG4       | 3.65956 |
| CDL/PE | 202024_at       | ASNA1        | 3.64948 |
| CDL/PE | 203152_at       | MRPL40       | 3.64715 |
| CDL/PE | 201682_at       | PMPCB        | 3.64288 |
| CDL/PE | 203974_at       | HDHD1A       | 3.63431 |
| CDL/PE | 219220_x<br>_at | MRPS22       | 3.62761 |
| CDL/PE | 209473_at       | ENTPD1       | 3.62065 |
| CDL/PE | 211150_s<br>_at | DLAT         | 3.62002 |
| CDL/PE | 202282_at       | HADH2        | 3.61773 |
| CDL/PE | 201349_at       | SLC9A3R<br>1 | 3.61423 |
| CDL/PE | 208818_s<br>_at | COMT         | 3.59483 |
| CDL/PE | 218773_s<br>_at | MSRB2        | 3.59282 |
| CDL/PE | 203634_s<br>_at | CPT1A        | 3.5859  |
| CDL/PE | 217990_at       | GMPR2        | 3.58535 |
| CDL/PE | 202591_s<br>_at | SSBP1        | 3.58495 |
| CDL/PE | 57588_at        | SLC24A3      | 3.57886 |
| CDL/PE | 202651_at       | LPGAT1       | 3.57628 |
| CDL/PE | 213897_s<br>_at | MRPL23       | 3.56797 |
| CDL/PE | 203095_at       | MTIF2        | 3.56783 |
| CDL/PE | 204044_at       | QPRT         | 3.55894 |
| CDL/PE | 202382_s<br>_at | GNPDA1       | 3.55891 |
| CDL/PE | 200832_s<br>_at | SCD          | 3.5362  |
| CDL/PE | 201757_at       | NDUFS5       | 3.52544 |
| CDL/PE | 209746_s<br>_at | COQ7         | 3.52506 |
| CDL/PE | 218592_s<br>_at | CECR5        | 3.52321 |
| CDL/PE | 204295_at       | SURF1        | 3.52144 |

|                |                 |          |         |
|----------------|-----------------|----------|---------|
| CDL/PE         | 202139_at       | AKR7A2   | 3.51315 |
| CDL/PE         | 214306_at       | OPA1     | 3.50174 |
| CDL/PE         | 203433_at       | MTHFS    | 3.49831 |
| CDL/PE         | 202447_at       | DECR1    | 3.49795 |
| CDL/PE         | 218320_s<br>_at | NDUFB11  | 3.48636 |
| CDL/PE         | 203672_x<br>_at | TPMT     | 3.48145 |
| CDL/PE         | 213835_x<br>_at | GTPBP3   | 3.48008 |
| CDL/PE         | 203335_at       | PHYH     | 3.47716 |
| CDL/PE         | 205260_s<br>_at | ACYP1    | 3.4736  |
| CDL/PE         | 212814_at       | KIAA0828 | 3.46532 |
| CDL/PE         | 209279_s<br>_at | NSDHL    | 3.45276 |
| CDL/PE         | 211752_s<br>_at | NDUFS7   | 3.44301 |
| CDL/PE         | 221692_s<br>_at | MRPL34   | 3.44045 |
| CDL/PE         | 202950_at       | CRYZ     | 3.43978 |
| CDL/PE         | 218558_s<br>_at | MRPL39   | 3.42189 |
| CDL/PE         | 201256_at       | COX7A2L  | 3.41696 |
| Luminal<br>CDL | 212510_at       | GPD1L    | -9.0625 |
| Luminal<br>CDL | 204942_s<br>_at | ALDH3B2  | -8.8636 |
| Luminal<br>CDL | 203963_at       | CA12     | -8.6304 |
| Luminal<br>CDL | 204508_s<br>_at | CA12     | -8.2544 |
| Luminal<br>CDL | 209164_s<br>_at | CYB561   | -8.1569 |
| Luminal<br>CDL | 209696_at       | FBP1     | -8.0299 |
| Luminal<br>CDL | 215867_x<br>_at | CA12     | -7.7363 |
| Luminal<br>CDL | 221589_s<br>_at | ALDH6A1  | -7.4612 |
| Luminal<br>CDL | 214164_x<br>_at | CA12     | -7.395  |
| Luminal<br>CDL | 221927_s<br>_at | ABHD11   | -7.3634 |

|             |             |         |         |
|-------------|-------------|---------|---------|
| Luminal CDL | 204862_s_at | NME3    | -7.248  |
| Luminal CDL | 204290_s_at | ALDH6A1 | -7.2004 |
| Luminal CDL | 207522_s_at | ATP2A3  | -7.0913 |
| Luminal CDL | 217973_at   | DCXR    | -6.9356 |
| Luminal CDL | 209460_at   | ABAT    | -6.79   |
| Luminal CDL | 209163_at   | CYB561  | -6.6979 |
| Luminal CDL | 204067_at   | SUOX    | -6.6832 |
| Luminal CDL | 210859_x_at | CLN3    | -6.588  |
| Luminal CDL | 209623_at   | MCCC2   | -6.5573 |
| Luminal CDL | 209275_s_at | CLN3    | -6.4859 |
| Luminal CDL | 210735_s_at | CA12    | -6.4327 |
| Luminal CDL | 208998_at   | UCP2    | -6.3503 |
| Luminal CDL | 221588_x_at | ALDH6A1 | -6.3051 |
| Luminal CDL | 208997_s_at | UCP2    | -6.1374 |
| Luminal CDL | 203773_x_at | BLVRA   | -6.0564 |
| Luminal CDL | 203633_at   | CPT1A   | -5.9788 |
| Luminal CDL | 211729_x_at | BLVRA   | -5.8555 |
| Luminal CDL | 215726_s_at | CYB5    | -5.7751 |
| Luminal CDL | 209366_x_at | CYB5    | -5.7671 |
| Luminal CDL | 207843_x_at | CYB5    | -5.7443 |
| Luminal CDL | 214203_s_at | PRODH   | -5.7376 |
| Luminal CDL | 202752_x_at | SLC7A8  | -5.6971 |
| Luminal CDL | 216092_s_at | SLC7A8  | -5.6288 |
| Luminal CDL | 218320_s_at | NDUFB11 | -5.5474 |
| Luminal CDL | 209459_s_at | ABAT    | -5.5374 |
| Luminal CDL | 213106_at   | ATP8A1  | -5.5256 |



|             |             |          |         |
|-------------|-------------|----------|---------|
| Luminal CDL | 204624_at   | ATP7B    | -5.4122 |
| Luminal CDL | 209624_s_at | MCCC2    | -5.4102 |
| Luminal CDL | 203771_s_at | BLVRA    | -5.3645 |
| Luminal CDL | 209224_s_at | NDUFA2   | -5.3355 |
| Luminal CDL | 211552_s_at | ALDH4A1  | -5.3171 |
| Luminal CDL | 202982_s_at | ZAP128   | -5.272  |
| Luminal CDL | 220741_s_at | PPA2     | -5.2444 |
| Luminal CDL | 204607_at   | HMGCS2   | -5.1335 |
| Luminal CDL | 208764_s_at | ATP5G2   | -5.1151 |
| Luminal CDL | 203478_at   | NDUFC1   | -4.9587 |
| Luminal CDL | 200925_at   | COX6A1   | -4.9512 |
| Luminal CDL | 212053_at   | KIAA0251 | -4.8791 |
| Luminal CDL | 203342_at   | TIMM17B  | -4.8565 |
| Luminal CDL | 203115_at   | FECH     | -4.8198 |
| Luminal CDL | 201754_at   | COX6C    | -4.791  |
| Luminal CDL | 210980_s_at | ASAH1    | -4.779  |
| Luminal CDL | 203515_s_at | PMVK     | -4.7779 |
| Luminal CDL | 219080_s_at | CTPS2    | -4.7412 |
| Luminal CDL | 218021_at   | DHRS4    | -4.7099 |
| Luminal CDL | 212560_at   | SORL1    | -4.672  |
| Luminal CDL | 204941_s_at | ALDH3B2  | -4.6423 |
| Luminal CDL | 213702_x_at | ASAH1    | -4.633  |
| Luminal CDL | 203722_at   | ALDH4A1  | -4.6165 |
| Luminal CDL | 203634_s_at | CPT1A    | -4.5663 |
| Luminal CDL | 208817_at   | COMT     | -4.5463 |
| Luminal CDL | 210045_at   | IDH2     | -4.5293 |

|             |             |                   |         |
|-------------|-------------|-------------------|---------|
| Luminal CDL | 206043_s_at | KIAA0703          | -4.5005 |
| Luminal CDL | 208818_s_at | COMT              | -4.4787 |
| Luminal CDL | 218563_at   | NDUFA3            | -4.4693 |
| Luminal CDL | 218164_at   | SSP411            | -4.4302 |
| Luminal CDL | 213042_s_at | ATP2A3            | -4.4241 |
| Luminal CDL | 206754_s_at | CYP2B6            | -4.4218 |
| Luminal CDL | 211569_s_at | HADHSC            | -4.4152 |
| Luminal CDL | 209600_s_at | ACOX1             | -4.3994 |
| Luminal CDL | 209919_x_at | GGT1              | -4.3172 |
| Luminal CDL | 211417_x_at | GGT1              | -4.268  |
| Luminal CDL | 219429_at   | FA2H              | -4.2593 |
| Luminal CDL | 205770_at   | GSR               | -4.255  |
| Luminal CDL | 205012_s_at | HAGH              | -4.2469 |
| Luminal CDL | 215603_x_at | GGT1 ///<br>GGTL4 | -4.24   |
| Luminal CDL | 209522_s_at | CRAT              | -4.2225 |
| Luminal CDL | 205355_at   | ACADSB            | -4.2177 |
| Luminal CDL | 204231_s_at | FAAH              | -4.2064 |
| Luminal CDL | 210688_s_at | CPT1A             | -4.1697 |
| Luminal CDL | 211715_s_at | BDH               | -4.1624 |
| Luminal CDL | 219664_s_at | DECR2             | -4.1619 |
| Luminal CDL | 210816_s_at | CYB561            | -4.1344 |
| Luminal CDL | 209916_at   | DHTKD1            | -4.1314 |
| Luminal CDL | 201525_at   | APOD              | -4.126  |
| Luminal CDL | 204867_at   | GCHFR             | -4.1136 |
| Luminal CDL | 207131_x_at | GGT1              | -4.1131 |
| Luminal CDL | 205709_s_at | CDS1              | -4.1071 |

|             |             |         |         |
|-------------|-------------|---------|---------|
| Luminal CDL | 201036_s_at | HADHSC  | -4.0907 |
| Luminal CDL | 204295_at   | SURF1   | -4.0768 |
| Luminal CDL | 202712_s_at | CKMT1   | -4.0655 |
| Luminal CDL | 217491_x_at | COX7C   | -4.0479 |
| Luminal CDL | 218025_s_at | PECI    | -4.0451 |
| Luminal CDL | 213501_at   | ACOX1   | -4.0329 |
| Luminal CDL | 205066_s_at | ENPP1   | -3.9994 |
| Luminal CDL | 200966_x_at | ALDOA   | -3.9884 |
| Luminal CDL | 222217_s_at | SLC27A3 | -3.9593 |
| Luminal CDL | 213540_at   | HSD17B8 | -3.9269 |
| Luminal CDL | 218773_s_at | MSRB2   | -3.9203 |
| Luminal CDL | 208284_x_at | GGT1    | -3.9095 |
| Luminal CDL | 215695_s_at | GYG2    | -3.9086 |
| Luminal CDL | 214687_x_at | ALDOA   | -3.8994 |
| Luminal CDL | 201134_x_at | COX7C   | -3.8804 |
| Luminal CDL | 216381_x_at | AKR7A3  | -3.8267 |
| Luminal CDL | 203116_s_at | FECH    | -3.8235 |
| Luminal CDL | 201612_at   | ALDH9A1 | -3.8102 |
| Luminal CDL | 212062_at   | ATP9A   | -3.8023 |
| Luminal CDL | 205843_x_at | CRAT    | -3.7921 |
| Luminal CDL | 210272_at   | CYP2B6  | -3.7806 |
| Luminal CDL | 218190_s_at | HSPC051 | -3.7694 |
| Luminal CDL | 212656_at   | TSFM    | -3.7556 |
| Luminal CDL | 212772_s_at | ABCA2   | -3.7402 |
| Luminal CDL | 202590_s_at | PDK2    | -3.7368 |
| Luminal CDL | 215299_x_at | SULT1A1 | -3.7017 |

|             |             |          |         |
|-------------|-------------|----------|---------|
| Luminal CDL | 203509_at   | SORL1    | -3.6966 |
| Luminal CDL | 201966_at   | NDUFS2   | -3.6583 |
| Luminal CDL | 210046_s_at | IDH2     | -3.6325 |
| Luminal CDL | 217942_at   | MRPS35   | -3.632  |
| Luminal CDL | 210010_s_at | SLC25A1  | -3.6242 |
| Luminal CDL | 218760_at   | COQ6     | -3.6127 |
| Luminal CDL | 213846_at   | COX7C    | -3.6069 |
| Luminal CDL | 203767_s_at | STS      | -3.6056 |
| Luminal CDL | 216591_s_at | SDHC     | -3.593  |
| Luminal CDL | 218844_at   | FLJ20920 | -3.5739 |
| Luminal CDL | 201568_at   | QP-C     | -3.5521 |
| Luminal CDL | 203768_s_at | STS      | -3.5413 |
| Luminal CDL | 204717_s_at | SLC29A2  | -3.5405 |
| Luminal CDL | 204788_s_at | PPOX     | -3.4988 |
| Luminal CDL | 202263_at   | NQO3A2   | -3.4949 |
| Luminal CDL | 209531_at   | GSTZ1    | -3.4903 |
| Luminal CDL | 203615_x_at | SULT1A1  | -3.4461 |
| Luminal CDL | 202862_at   | FAH      | -3.4457 |
| Luminal CDL | 218985_at   | SLC2A8   | -3.4393 |
| Luminal CDL | 219722_s_at | MGC4171  | -3.4372 |
| Luminal CDL | 209221_s_at | OSBPL2   | -3.4265 |
| Luminal CDL | 214082_at   | CA5B     | -3.3894 |
| Luminal CDL | 201304_at   | NDUFA5   | -3.3821 |
| Luminal CDL | 206790_s_at | NDUFB1   | -3.3787 |
| Luminal CDL | 205073_at   | CYP2J2   | -3.3785 |
| Luminal CDL | 218988_at   | SLC35E3  | -3.3605 |

|             |             |                      |         |
|-------------|-------------|----------------------|---------|
| Luminal CDL | 203769_s_at | STS                  | -3.3564 |
| Luminal CDL | 204305_at   | MIPEP                | -3.3561 |
| Luminal CDL | 202282_at   | HADH2                | -3.3487 |
| Luminal CDL | 203458_at   | SPR                  | -3.3468 |
| Luminal CDL | 212322_at   | SGPL1                | -3.3274 |
| Luminal CDL | 201425_at   | ALDH2                | -3.3148 |
| Luminal CDL | 204573_at   | CROT                 | -3.3032 |
| Luminal CDL | 218112_at   | MRPS34               | -3.3029 |
| Luminal CDL | 218688_at   | DKFZP586B1621        | -3.2871 |
| Luminal CDL | 207122_x_at | SULT1A2              | -3.2835 |
| Luminal CDL | 202004_x_at | SDHC                 | -3.2761 |
| Luminal CDL | 201035_s_at | HADHSC               | -3.2748 |
| Luminal CDL | 218275_at   | SLC25A10             | -3.2599 |
| Luminal CDL | 205759_s_at | SULT2B1              | -3.2598 |
| Luminal CDL | 216958_s_at | IVD                  | -3.2472 |
| Luminal CDL | 215088_s_at | SDHC                 | -3.2448 |
| Luminal CDL | 36830_at    | MIPEP                | -3.2433 |
| Luminal CDL | 206469_x_at | AKR7A3               | -3.2199 |
| Luminal CDL | 222275_at   | MRPS30               | -3.217  |
| Luminal CDL | 211385_x_at | SULT1A2              | -3.2106 |
| Luminal CDL | 214079_at   | DHRS2                | -3.2039 |
| Luminal CDL | 202554_s_at | GSTM3                | -3.2011 |
| Luminal CDL | 220753_s_at | CRYL1                | -3.1957 |
| Luminal CDL | 214243_s_at | SERHL /// dJ222E13.1 | -3.1893 |
| Luminal CDL | 202593_s_at | MIR16                | -3.1812 |
| Luminal CDL | 203770_s_at | STS                  | -3.1768 |

|             |             |          |         |
|-------------|-------------|----------|---------|
| Luminal CDL | 221908_at   | FLJ14627 | -3.154  |
| Luminal CDL | 203682_s_at | IVD      | -3.1539 |
| Luminal CDL | 206463_s_at | DHRS2    | -3.1327 |
| Luminal CDL | 203576_at   | BCAT2    | -3.124  |
| Luminal CDL | 215794_x_at | GLUD2    | -3.106  |
| Luminal CDL | 215794_x_at | GLUD2    | -3.106  |
| Luminal CDL | 207521_s_at | ATP2A3   | -3.0957 |
| Luminal CDL | 203974_at   | HDHD1A   | -3.0884 |
| Luminal CDL | 209605_at   | TST      | -3.085  |
| Luminal CDL | 217773_s_at | NDUFA4   | -3.0848 |
| Luminal CDL | 200697_at   | HK1      | -3.068  |
| Luminal CDL | 218570_at   | KBTBD4   | -3.0645 |
| Luminal CDL | 203814_s_at | NQO2     | -3.0516 |
| Luminal CDL | 200789_at   | ECH1     | -3.0487 |
| Luminal CDL | 218212_s_at | MOCS2    | -3.0271 |
| Luminal CDL | 201413_at   | HSD17B4  | -3.0077 |
| Luminal CDL | 210149_s_at | ATP5H    | -2.9798 |
| Luminal CDL | 210246_s_at | ABCC8    | -2.961  |
| Luminal CDL | 219547_at   | COX15    | -2.9301 |
| Luminal CDL | 201931_at   | ETFA     | -2.913  |
| Luminal CDL | 218569_s_at | KBTBD4   | -2.9062 |
| Luminal CDL | 218226_s_at | NDUFB4   | -2.9061 |
| Luminal CDL | 200947_s_at | GLUD1    | -2.8894 |
| Luminal CDL | 200947_s_at | GLUD1    | -2.8894 |
| Luminal CDL | 201119_s_at | COX8A    | -2.88   |
| Luminal CDL | 218840_s_at | NADSYN1  | -2.8682 |

|             |             |          |         |
|-------------|-------------|----------|---------|
| Luminal CDL | 202959_at   | MUT      | -2.8633 |
| Luminal CDL | 221909_at   | FLJ14627 | -2.8473 |
| Luminal CDL | 206753_at   | RODH-4   | -2.8324 |
| Luminal CDL | 203800_s_at | MRPS14   | -2.8294 |
| Luminal CDL | 208972_s_at | ATP5G1   | -2.8264 |
| Luminal CDL | 201135_at   | ECHS1    | -2.8262 |
| Luminal CDL | 202025_x_at | ACAA1    | -2.8199 |
| Luminal CDL | 202275_at   | G6PD     | -2.8065 |
| Luminal CDL | 205776_at   | FMO5     | -2.7864 |
| Luminal CDL | 201661_s_at | ACSL3    | -2.7824 |
| Luminal CDL | 202532_s_at | DHFR     | -2.7746 |
| Luminal CDL | 205851_at   | NME6     | -2.766  |
| Luminal CDL | 204824_at   | ENDOG    | -2.7516 |
| Luminal CDL | 206527_at   | ABAT     | -2.7407 |
| Luminal CDL | 221139_s_at | CSAD     | -2.7278 |
| Luminal CDL | 204224_s_at | GCH1     | -2.7207 |
| Luminal CDL | 207335_x_at | ATP5I    | -2.7166 |
| Luminal CDL | 201102_s_at | PFKL     | -2.7016 |
| Luminal CDL | 201339_s_at | SCP2     | -2.7014 |
| Luminal CDL | 200946_x_at | GLUD1    | -2.6974 |
| Luminal CDL | 200946_x_at | GLUD1    | -2.6974 |
| Luminal CDL | 208291_s_at | TH       | -2.6938 |
| Luminal CDL | 211065_x_at | PFKL     | -2.685  |
| Luminal CDL | 217801_at   | ATP5E    | -2.6761 |
| Luminal CDL | 213333_at   | MDH2     | -2.6652 |
| Luminal CDL | 213333_at   | MDH2     | -2.6652 |

|             |             |          |         |
|-------------|-------------|----------|---------|
| Luminal CDL | 201403_s_at | MGST3    | -2.6614 |
| Luminal CDL | 201919_at   | FLJ10618 | -2.6539 |
| Luminal CDL | 206492_at   | FHIT     | -2.6512 |
| Luminal CDL | 209759_s_at | DCI      | -2.6488 |
| Luminal CDL | 204509_at   | CA12     | -2.6442 |
| Luminal CDL | 209607_x_at | SULT1A3  | -2.641  |
| Luminal CDL | 217990_at   | GMPT2    | -2.6399 |
| Luminal CDL | 202365_at   | MGC5139  | -2.6286 |
| Luminal CDL | 203190_at   | NDUFS8   | -2.6265 |
| Luminal CDL | 209492_x_at | ATP5I    | -2.6211 |
| Luminal CDL | 211177_s_at | TXNRD2   | -2.6181 |
| Luminal CDL | 201619_at   | PRDX3    | -2.6047 |
| Luminal CDL | 202077_at   | NDUFAB1  | -2.6005 |
| Luminal CDL | 217874_at   | SUCLG1   | -2.5918 |
| Luminal CDL | 201900_s_at | AKR1A1   | -2.5874 |
| Luminal CDL | 213724_s_at | PDK2     | -2.5839 |
| Luminal CDL | 218101_s_at | NDUFC2   | -2.5736 |
| N/I         | 220346_at   | MTHFD2L  | -10.052 |
| N/I         | 205676_at   | CYP27B1  | -9.5463 |
| N/I         | 215078_at   | SOD2     | -8.8738 |
| N/I         | 205844_at   | VNN1     | -7.1319 |
| N/I         | 204257_at   | FADS3    | -6.975  |
| N/I         | 209453_at   | SLC9A1   | -6.7676 |
| N/I         | 212741_at   | MAOA     | -6.7093 |
| N/I         | 210852_s_at | AASS     | -6.4098 |
| N/I         | 202804_at   | ABCC1    | -6.406  |



|     |             |          |         |
|-----|-------------|----------|---------|
| N/I | 219357_at   | GTPBP1   | -6.3769 |
| N/I | 217546_at   | MT1K     | -6.3576 |
| N/I | 204745_x_at | MT1G     | -6.2491 |
| N/I | 207604_s_at | SLC4A7   | -6.2477 |
| N/I | 219597_s_at | DUOX1    | -6.1868 |
| N/I | 216841_s_at | SOD2     | -6.0407 |
| N/I | 204294_at   | AMT      | -6.0315 |
| N/I | 32091_at    | KIAA0446 | -5.7938 |
| N/I | 202237_at   | NNMT     | -5.7455 |
| N/I | 219181_at   | LIPG     | -5.5709 |
| N/I | 207064_s_at | AOC2     | -5.5279 |
| N/I | 210876_at   | ANXA2    | -5.361  |
| N/I | 215223_s_at | SOD2     | -5.3157 |
| N/I | 204570_at   | COX7A1   | -5.2784 |
| N/I | 202235_at   | SLC16A1  | -5.275  |
| N/I | 203234_at   | UPP1     | -5.2737 |
| N/I | 207992_s_at | AMPD3    | -5.2548 |
| N/I | 202679_at   | NPC1     | -5.2471 |
| N/I | 212110_at   | SLC39A14 | -5.219  |
| N/I | 218717_s_at | LEPREL1  | -5.1995 |
| N/I | 202422_s_at | ACSL4    | -5.192  |
| N/I | 220232_at   | SCD4     | -5.1643 |
| N/I | 215082_at   | ELOVL5   | -5.1485 |
| N/I | 212859_x_at | MT1E     | -5.1266 |
| N/I | 217165_x_at | MT1F     | -5.1176 |
| N/I | 206461_x_at | MT1H     | -5.0682 |

|     |                 |                                                                |         |
|-----|-----------------|----------------------------------------------------------------|---------|
| N/I | 203158_s<br>_at | GLS                                                            | -5.0599 |
| N/I | 213629_x<br>_at | MT1F                                                           | -4.9972 |
| N/I | 218136_s<br>_at | MSCP                                                           | -4.9927 |
| N/I | 202800_at       | SLC1A3                                                         | -4.8789 |
| N/I | 218208_at       | PQLC1                                                          | -4.8398 |
| N/I | 202392_s<br>_at | PISD                                                           | -4.8308 |
| N/I | 220703_at       | C10orf110                                                      | -4.8087 |
| N/I | 208118_x<br>_at | LAT1-3TM<br>/// IMAA ///<br>LOC3882<br>21 ///<br>LOC4403<br>45 | -4.7757 |
| N/I | 200924_s<br>_at | SLC3A2                                                         | -4.7233 |
| N/I | 220528_at       | VNN3                                                           | -4.7089 |
| N/I | 202234_s<br>_at | SLC16A1                                                        | -4.6823 |
| N/I | 208581_x<br>_at | MT1X                                                           | -4.6066 |
| N/I | 205234_at       | SLC16A4                                                        | -4.6057 |
| N/I | 204894_s<br>_at | AOC3                                                           | -4.4972 |
| N/I | 209934_s<br>_at | ATP2C1                                                         | -4.4734 |
| N/I | 213113_s<br>_at | SLC43A3                                                        | -4.4679 |
| N/I | 201012_at       | ANXA1                                                          | -4.4632 |
| N/I | 209369_at       | ANXA3                                                          | -4.4421 |
| N/I | 200710_at       | ACADVL                                                         | -4.4408 |
| N/I | 219489_s<br>_at | NXN                                                            | -4.4022 |
| N/I | 207386_at       | CYP7B1                                                         | -4.3709 |
| N/I | 203074_at       | ANXA8                                                          | -4.3381 |
| N/I | 203157_s<br>_at | GLS                                                            | -4.1904 |
| N/I | 209674_at       | CRY1                                                           | -4.1775 |

|     |                 |               |         |
|-----|-----------------|---------------|---------|
| N/I | 206376_at       | SLC6A15       | -4.1535 |
| N/I | 204154_at       | CDO1          | -4.1468 |
| N/I | 213988_s<br>_at | SAT           | -4.119  |
| N/I | 219397_at       | FLJ13448      | -4.1121 |
| N/I | 201300_s<br>_at | PRNP          | -4.0997 |
| N/I | 214829_at       | AASS          | -4.0819 |
| N/I | 214241_at       | NDUFB8        | -4.0817 |
| N/I | 219558_at       | ATP13A3       | -4.044  |
| N/I | 209900_s<br>_at | SLC16A1       | -4.0364 |
| N/I | 214285_at       | FABP3         | -4.0128 |
| N/I | 213238_at       | ATP10D        | -4.0126 |
| N/I | 221432_s<br>_at | SLC25A28      | -3.9987 |
| N/I | 36566_at        | CTNS          | -3.9634 |
| N/I | 202854_at       | HPRT1         | -3.9484 |
| N/I | 209935_at       | ATP2C1        | -3.9398 |
| N/I | 203455_s<br>_at | SAT           | -3.928  |
| N/I | 215607_x<br>_at | KIAA2010      | -3.853  |
| N/I | 206628_at       | SLC5A1        | -3.8422 |
| N/I | 218739_at       | ABHD5         | -3.8342 |
| N/I | 210592_s<br>_at | SAT           | -3.831  |
| N/I | 212434_at       | GRPEL1        | -3.7959 |
| N/I | 221992_at       | LOC2839<br>70 | -3.7423 |
| N/I | 218552_at       | ECHDC2        | -3.7317 |
| N/I | 219532_at       | ELOVL4        | -3.6654 |
| N/I | 206867_at       | "GCKR         | -3.658  |
| N/I | 204326_x<br>_at | MT1X          | -3.6466 |
| N/I | 203180_at       | ALDH1A3       | -3.6241 |

|     |           |     |         |
|-----|-----------|-----|---------|
| N/I | 204663_at | ME3 | -3.6199 |
| N/I | 217395_at | MT4 | -3.6017 |

olism-associated transcripts identified from three significance analyses using the Timmerman\_r

cinoma derived cell lines (CDL) and uncultured pleural effusions (PE).













































































merge dataset:
